# Supplementary material for: Discovery of thieno[2,3-d]pyrimidine-based dual Aurora B/VEGFR-2 inhibitors with potent anticancer activity: molecular docking, mechanistic studies, and in vivo validation in a breast cancer model
Source: Royal Society of Chemistry journal article supplement (doi:10.1039/d5ra09370h), 2026-04-22
Supplement: d5ra09370h1.pdf [file d5ra09370h1.pdf]

### Supplementary data

#### **Discovery of Thieno[2,3-*d*]pyrimidine-Based Dual Aurora-B/VEGFR-2 Inhibitors with Potent Anticancer Activity: Molecular Docking, Mechanistic Studies, and *In Vivo* Validation in a Breast Cancer Model**

Hamed W. El-Shafey<sup>a</sup>, Abdelrahman Hamdi<sup>a†</sup>, Mohamed R. Elnagar<sup>b,c</sup>, Sahar M. Gebрил<sup>d</sup>, Abdullah Haikal<sup>e</sup>, Adel S. El-Azab<sup>f</sup>, Simone Brogi<sup>g</sup>, Ibrahim A. Al-Suwaidan<sup>f</sup>, Alaa A.-M. Abdel-Aziz<sup>f</sup>

<sup>a</sup> *Department of Pharmaceutical Organic Chemistry, Faculty of Pharmacy, Mansoura University, Mansoura 35516, Egypt.*

<sup>b</sup> *Department of Pharmacology and Toxicology, Faculty of Pharmacy, Al-Azhar University, Cairo 11823, Egypt.*

<sup>c</sup> *Department of Pharmacology, College of Pharmacy, The Islamic University, Najaf 54001, Iraq.*

<sup>d</sup> *Department of Histology and Cell Biology, Faculty of Medicine, Sohag University, Sohag 82524, Egypt*

<sup>e</sup> *Department of Pharmacognosy, Faculty of Pharmacy, Mansoura University, Mansoura, 35516, Egypt*

<sup>f</sup> *Department of Pharmaceutical Chemistry, College of Pharmacy, P.O. Box 2457, King Saud University, Riyadh 11451, Saudi Arabia*

<sup>g</sup> *Department of Pharmacy, University of Pisa, Via Bonanno 6, 56126 Pisa, Italy*

† Corresponding authors: E-mail addresses: [abdelrahmanhamdi2012@mans.edu.eg](mailto:abdelrahmanhamdi2012@mans.edu.eg) (Abdelrahman Hamdi)

Eman Nasr\_CH3  
single\_pulse

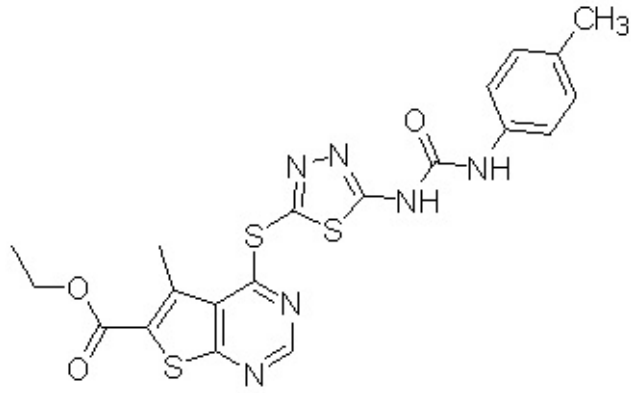

M1

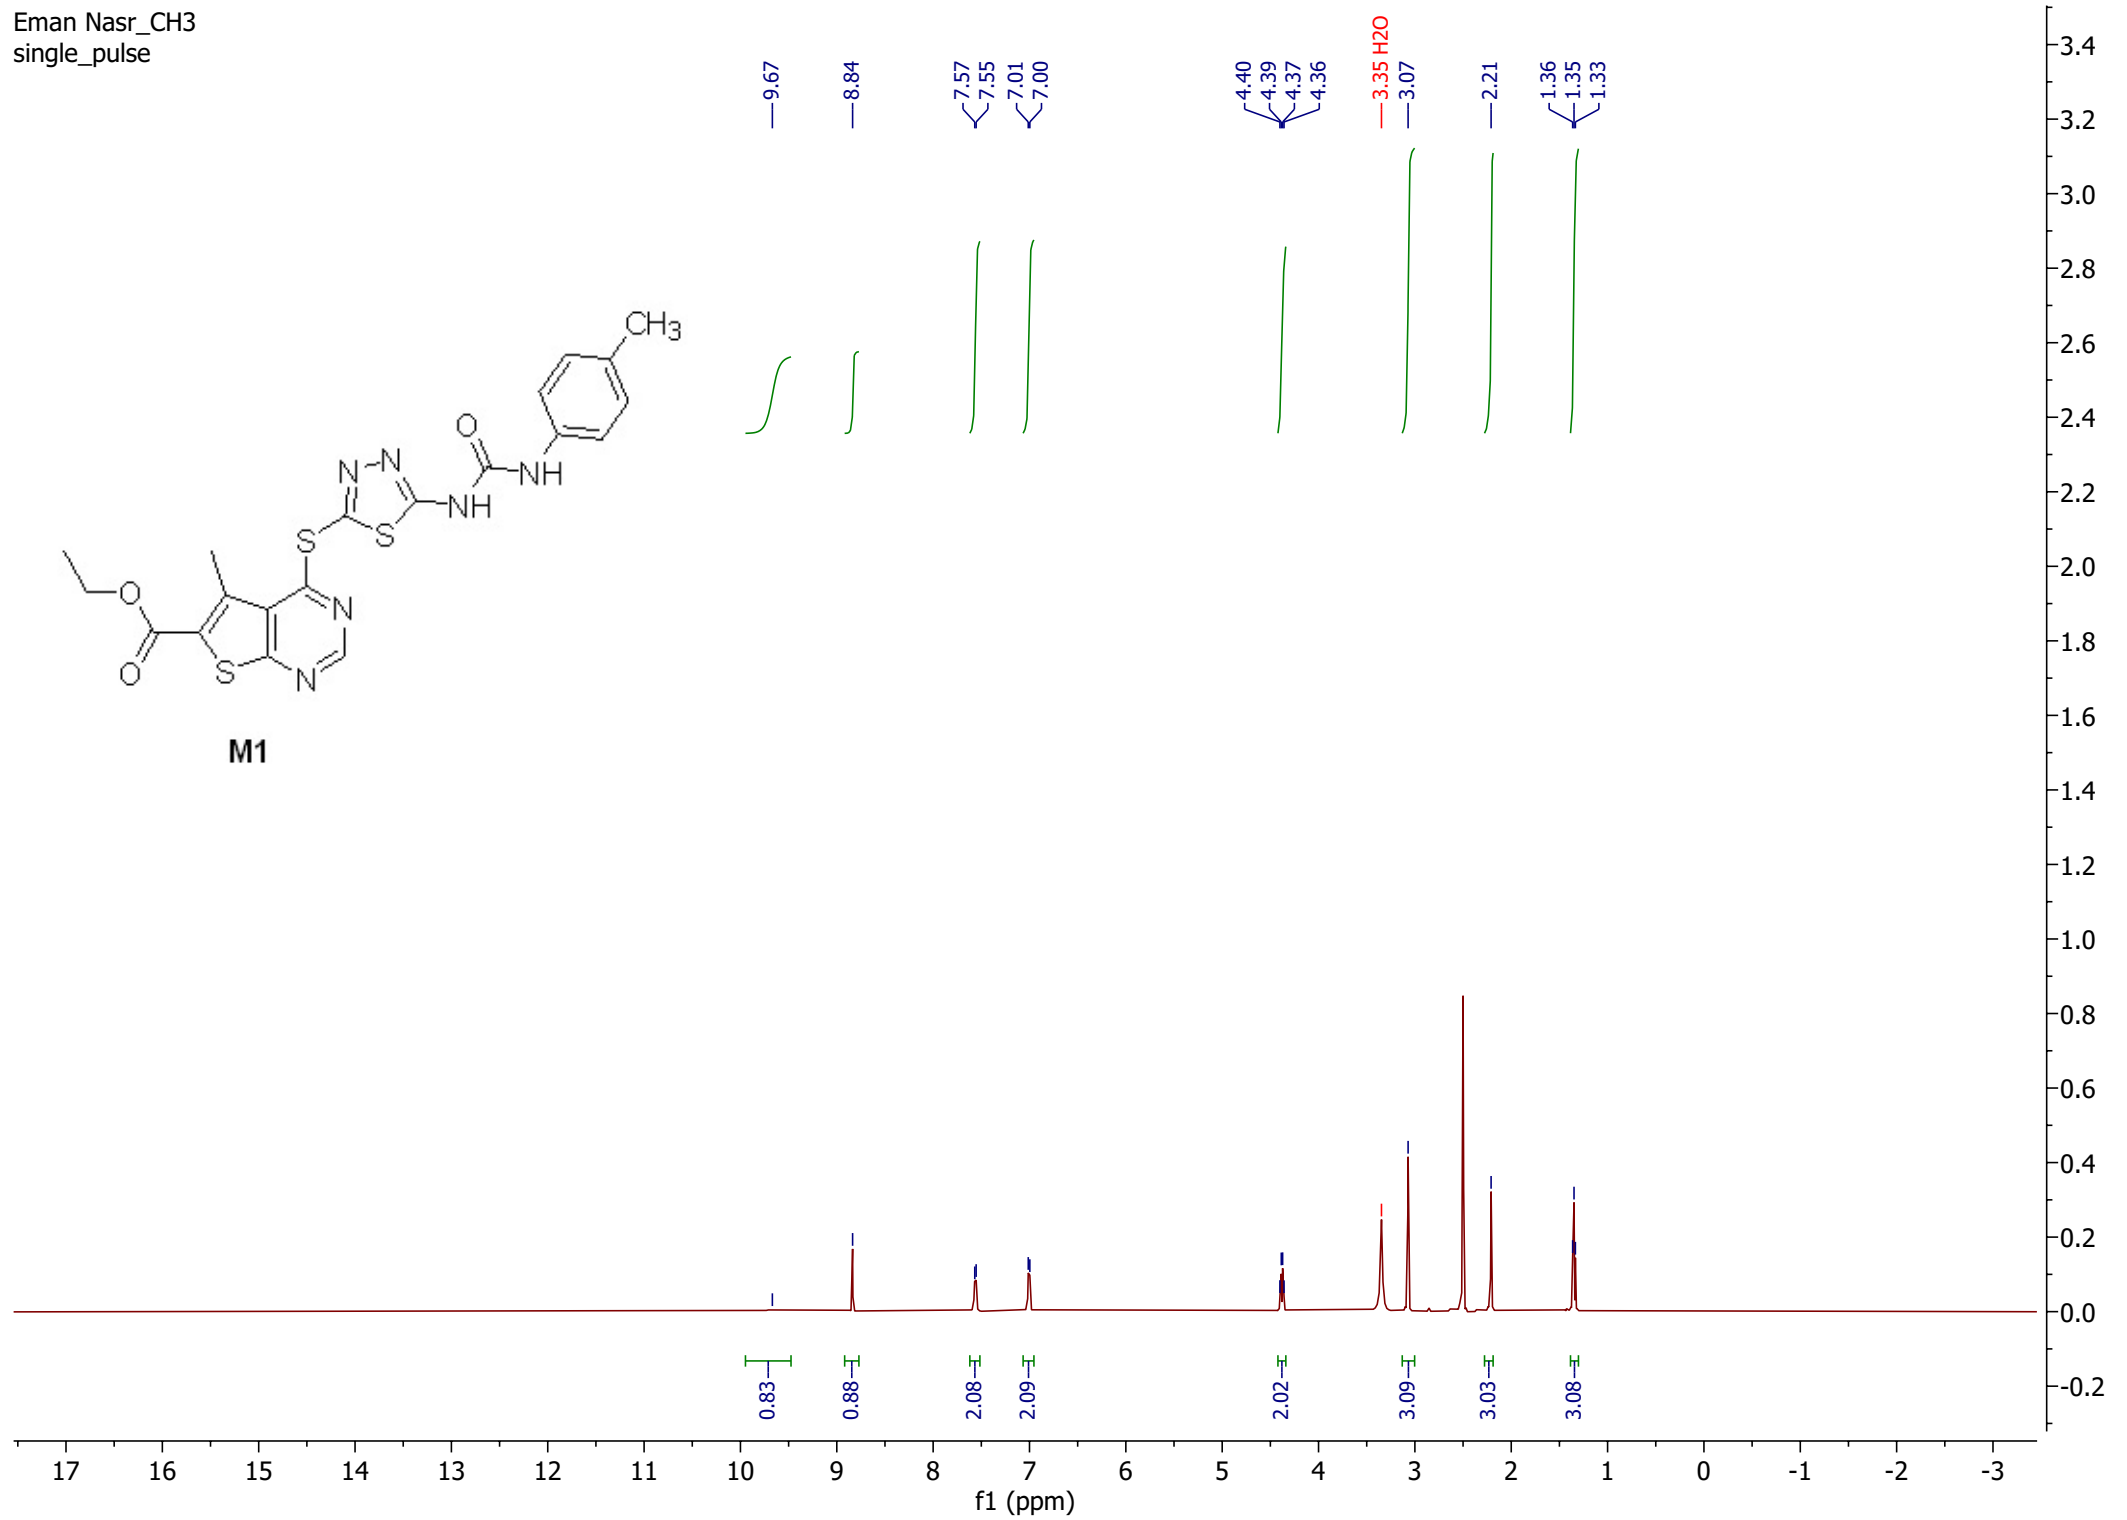

Eman Nasr\_OCH3  
single\_pulse

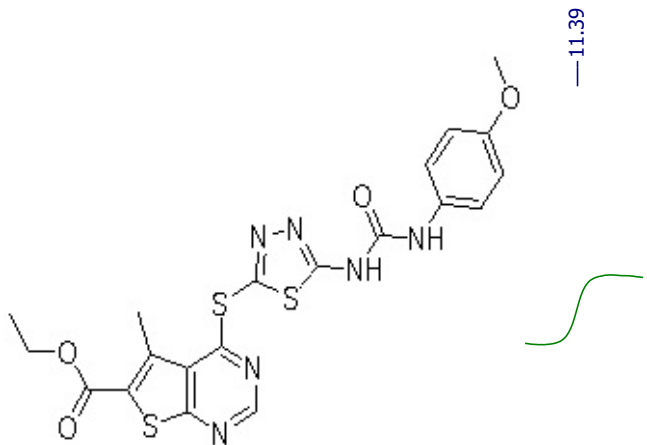

M2

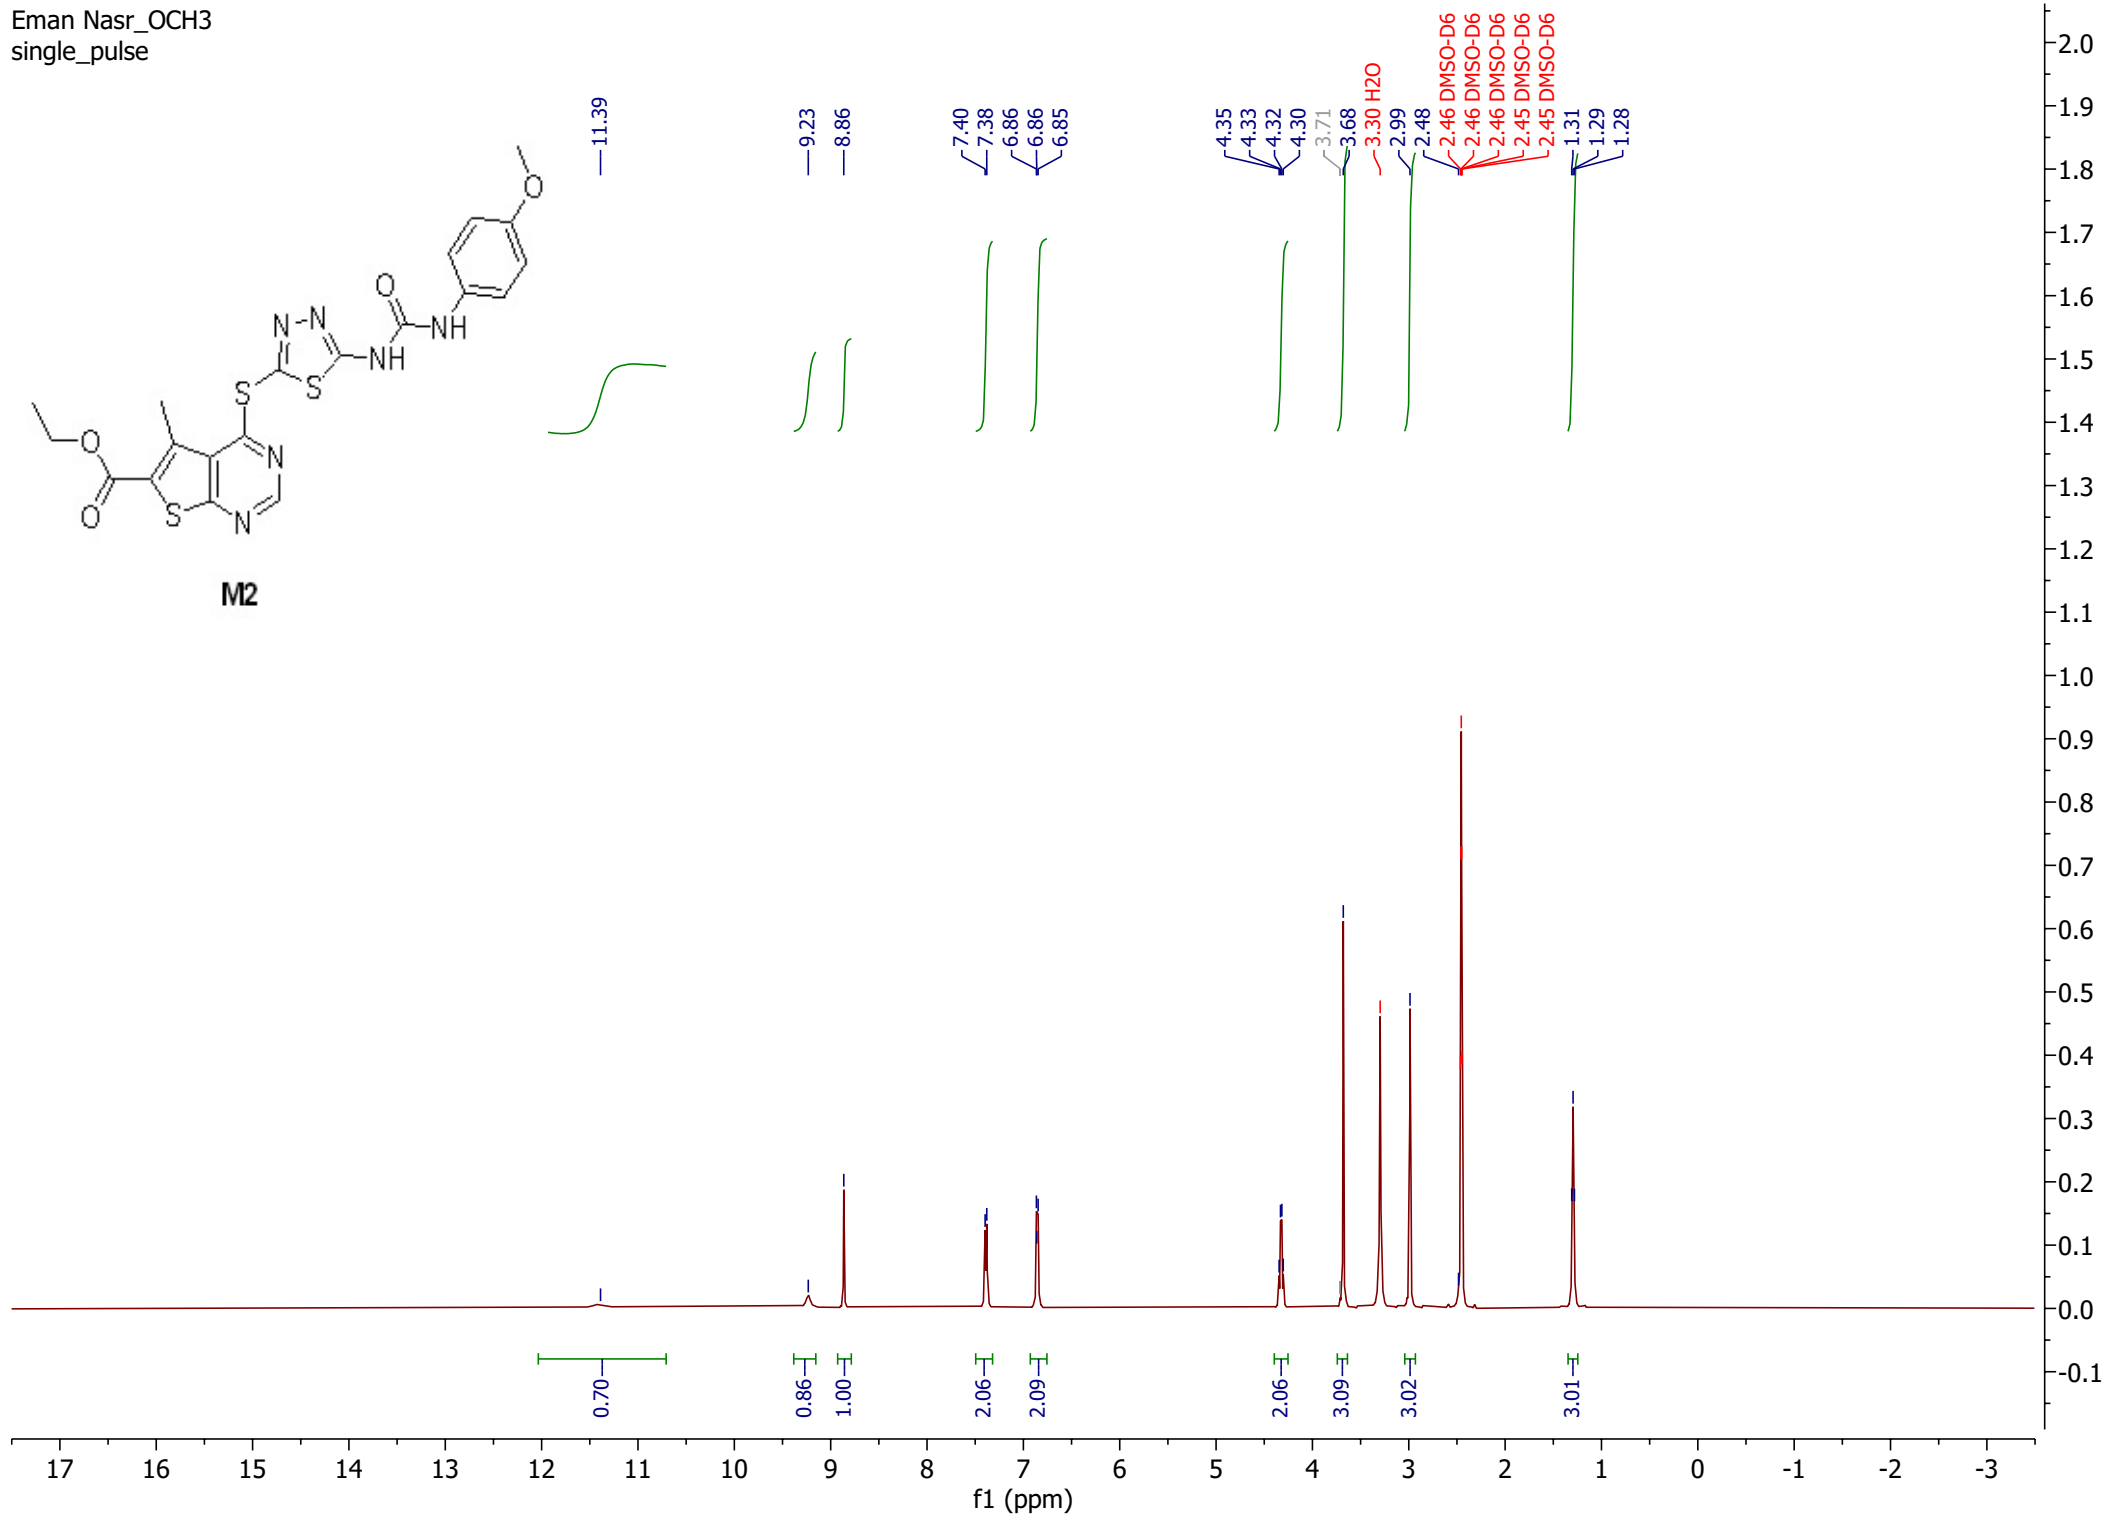

Eman Nasr\_SOVa  
single\_pulse

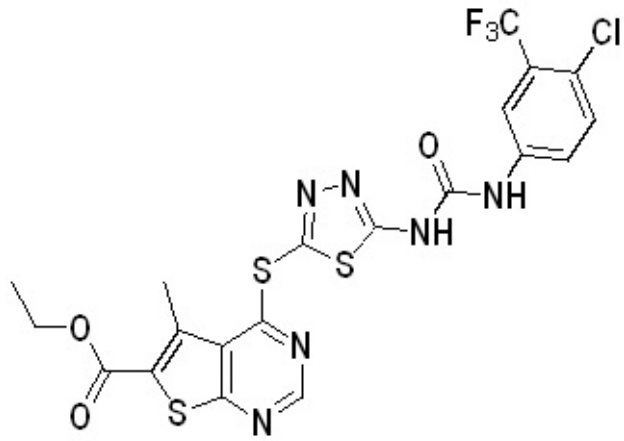

M3

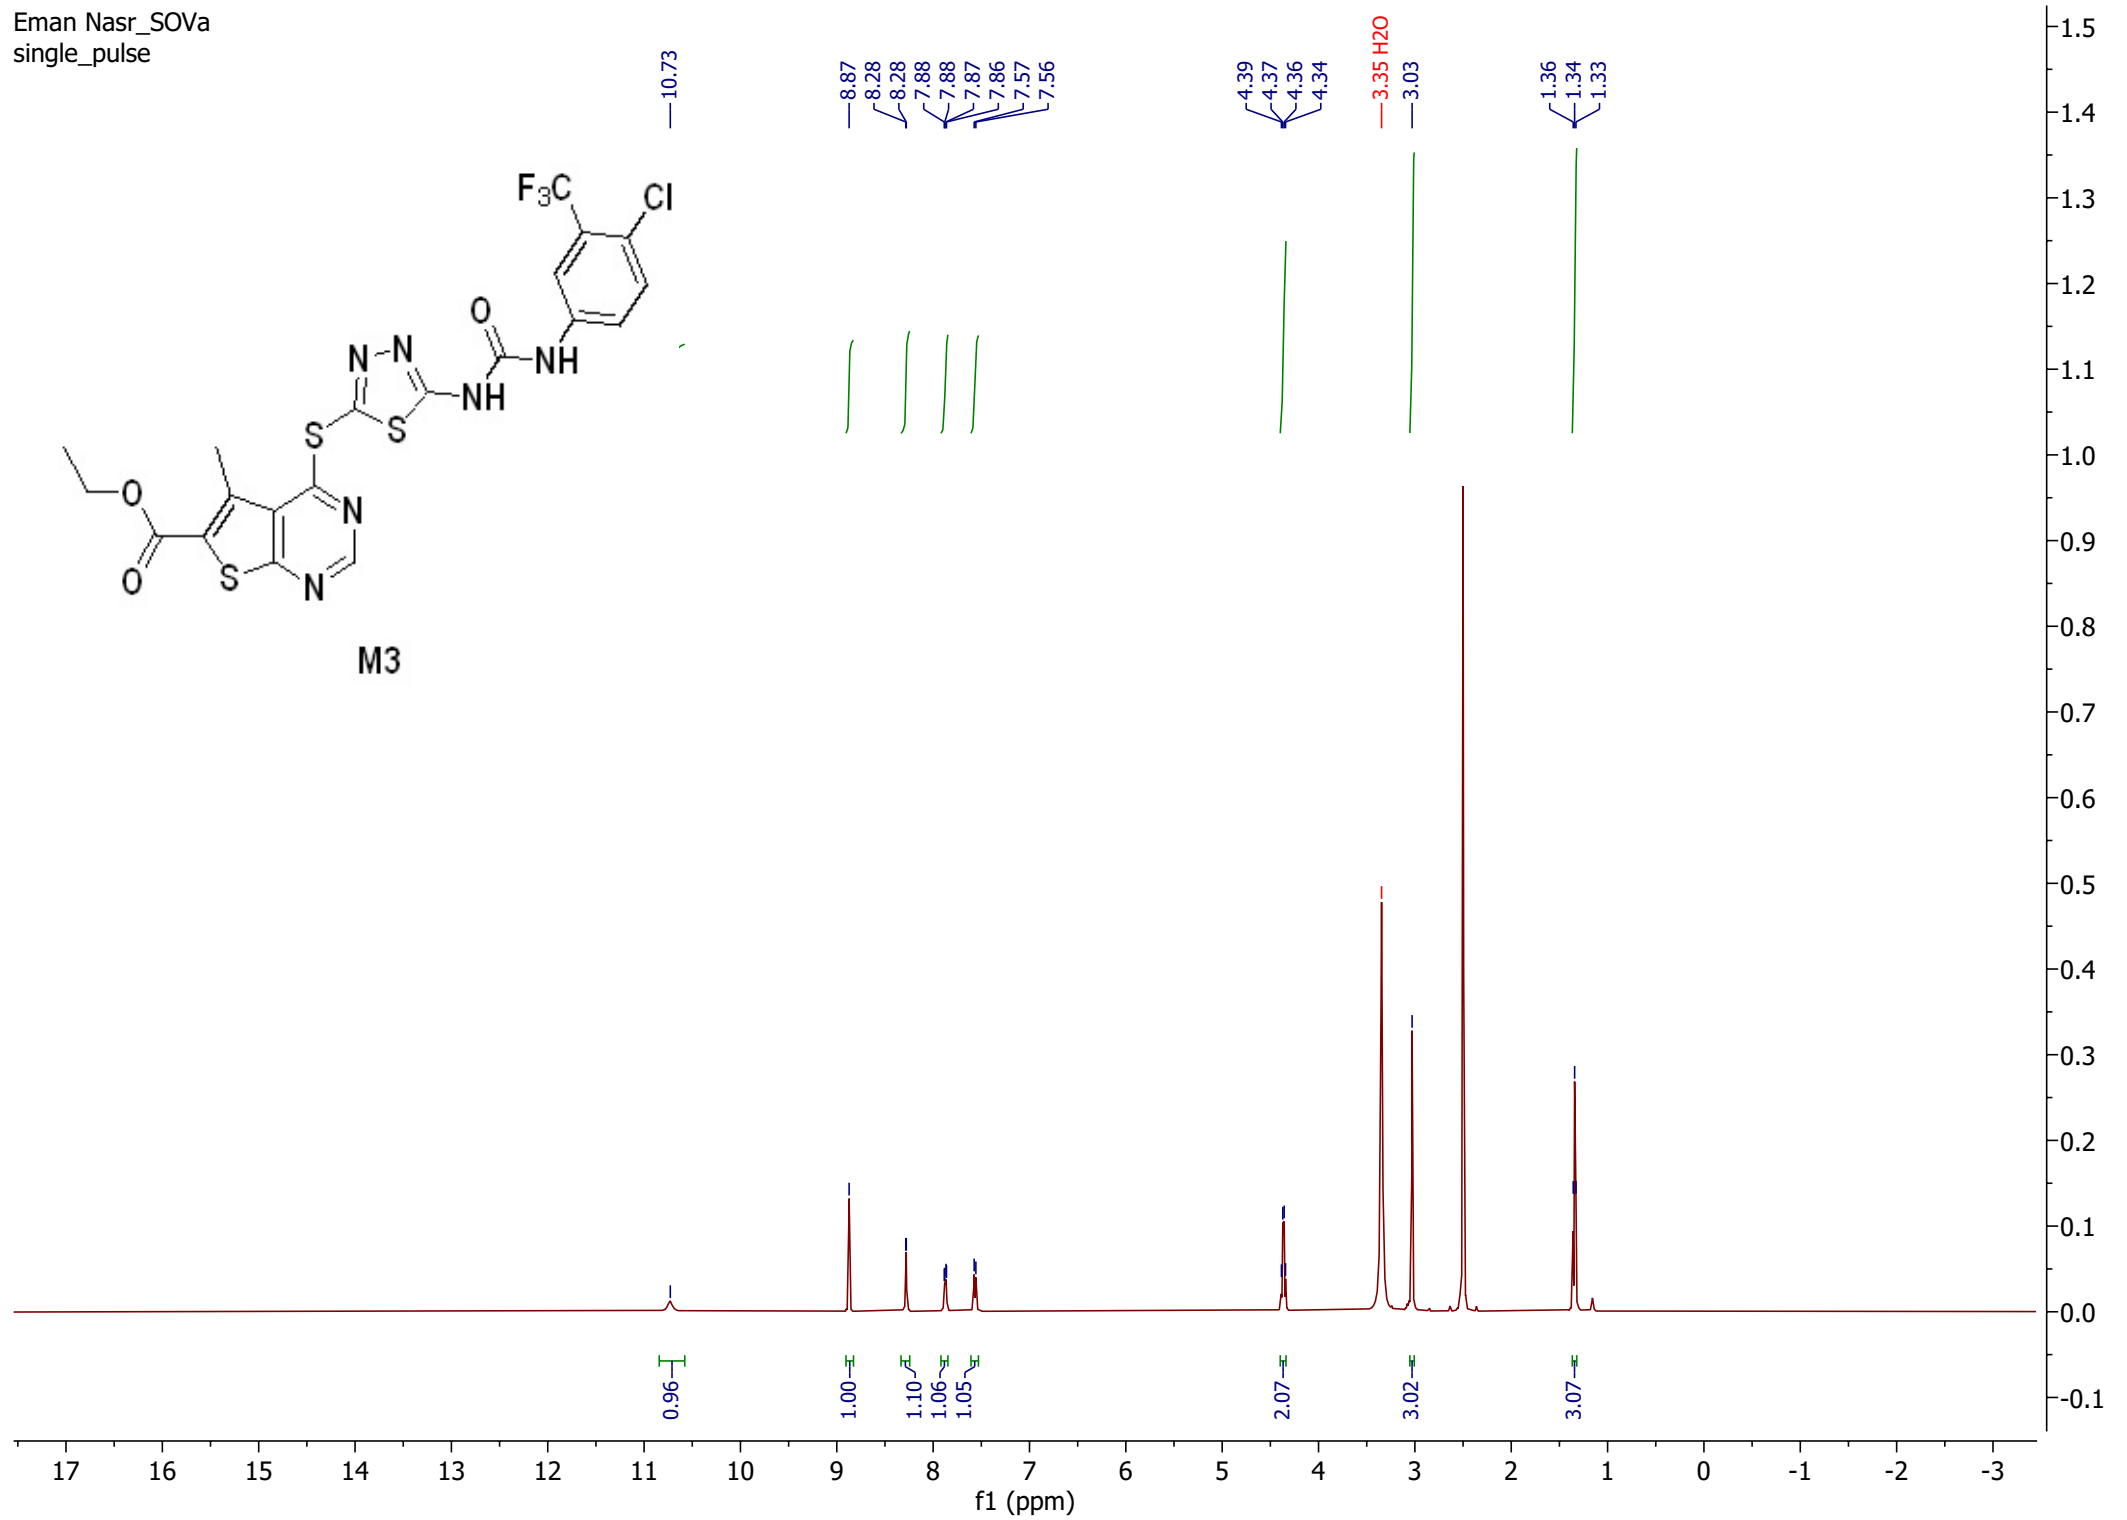

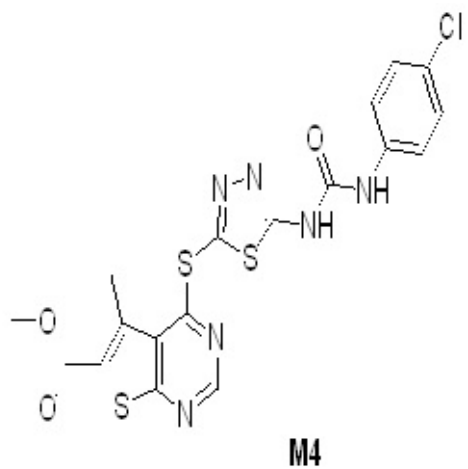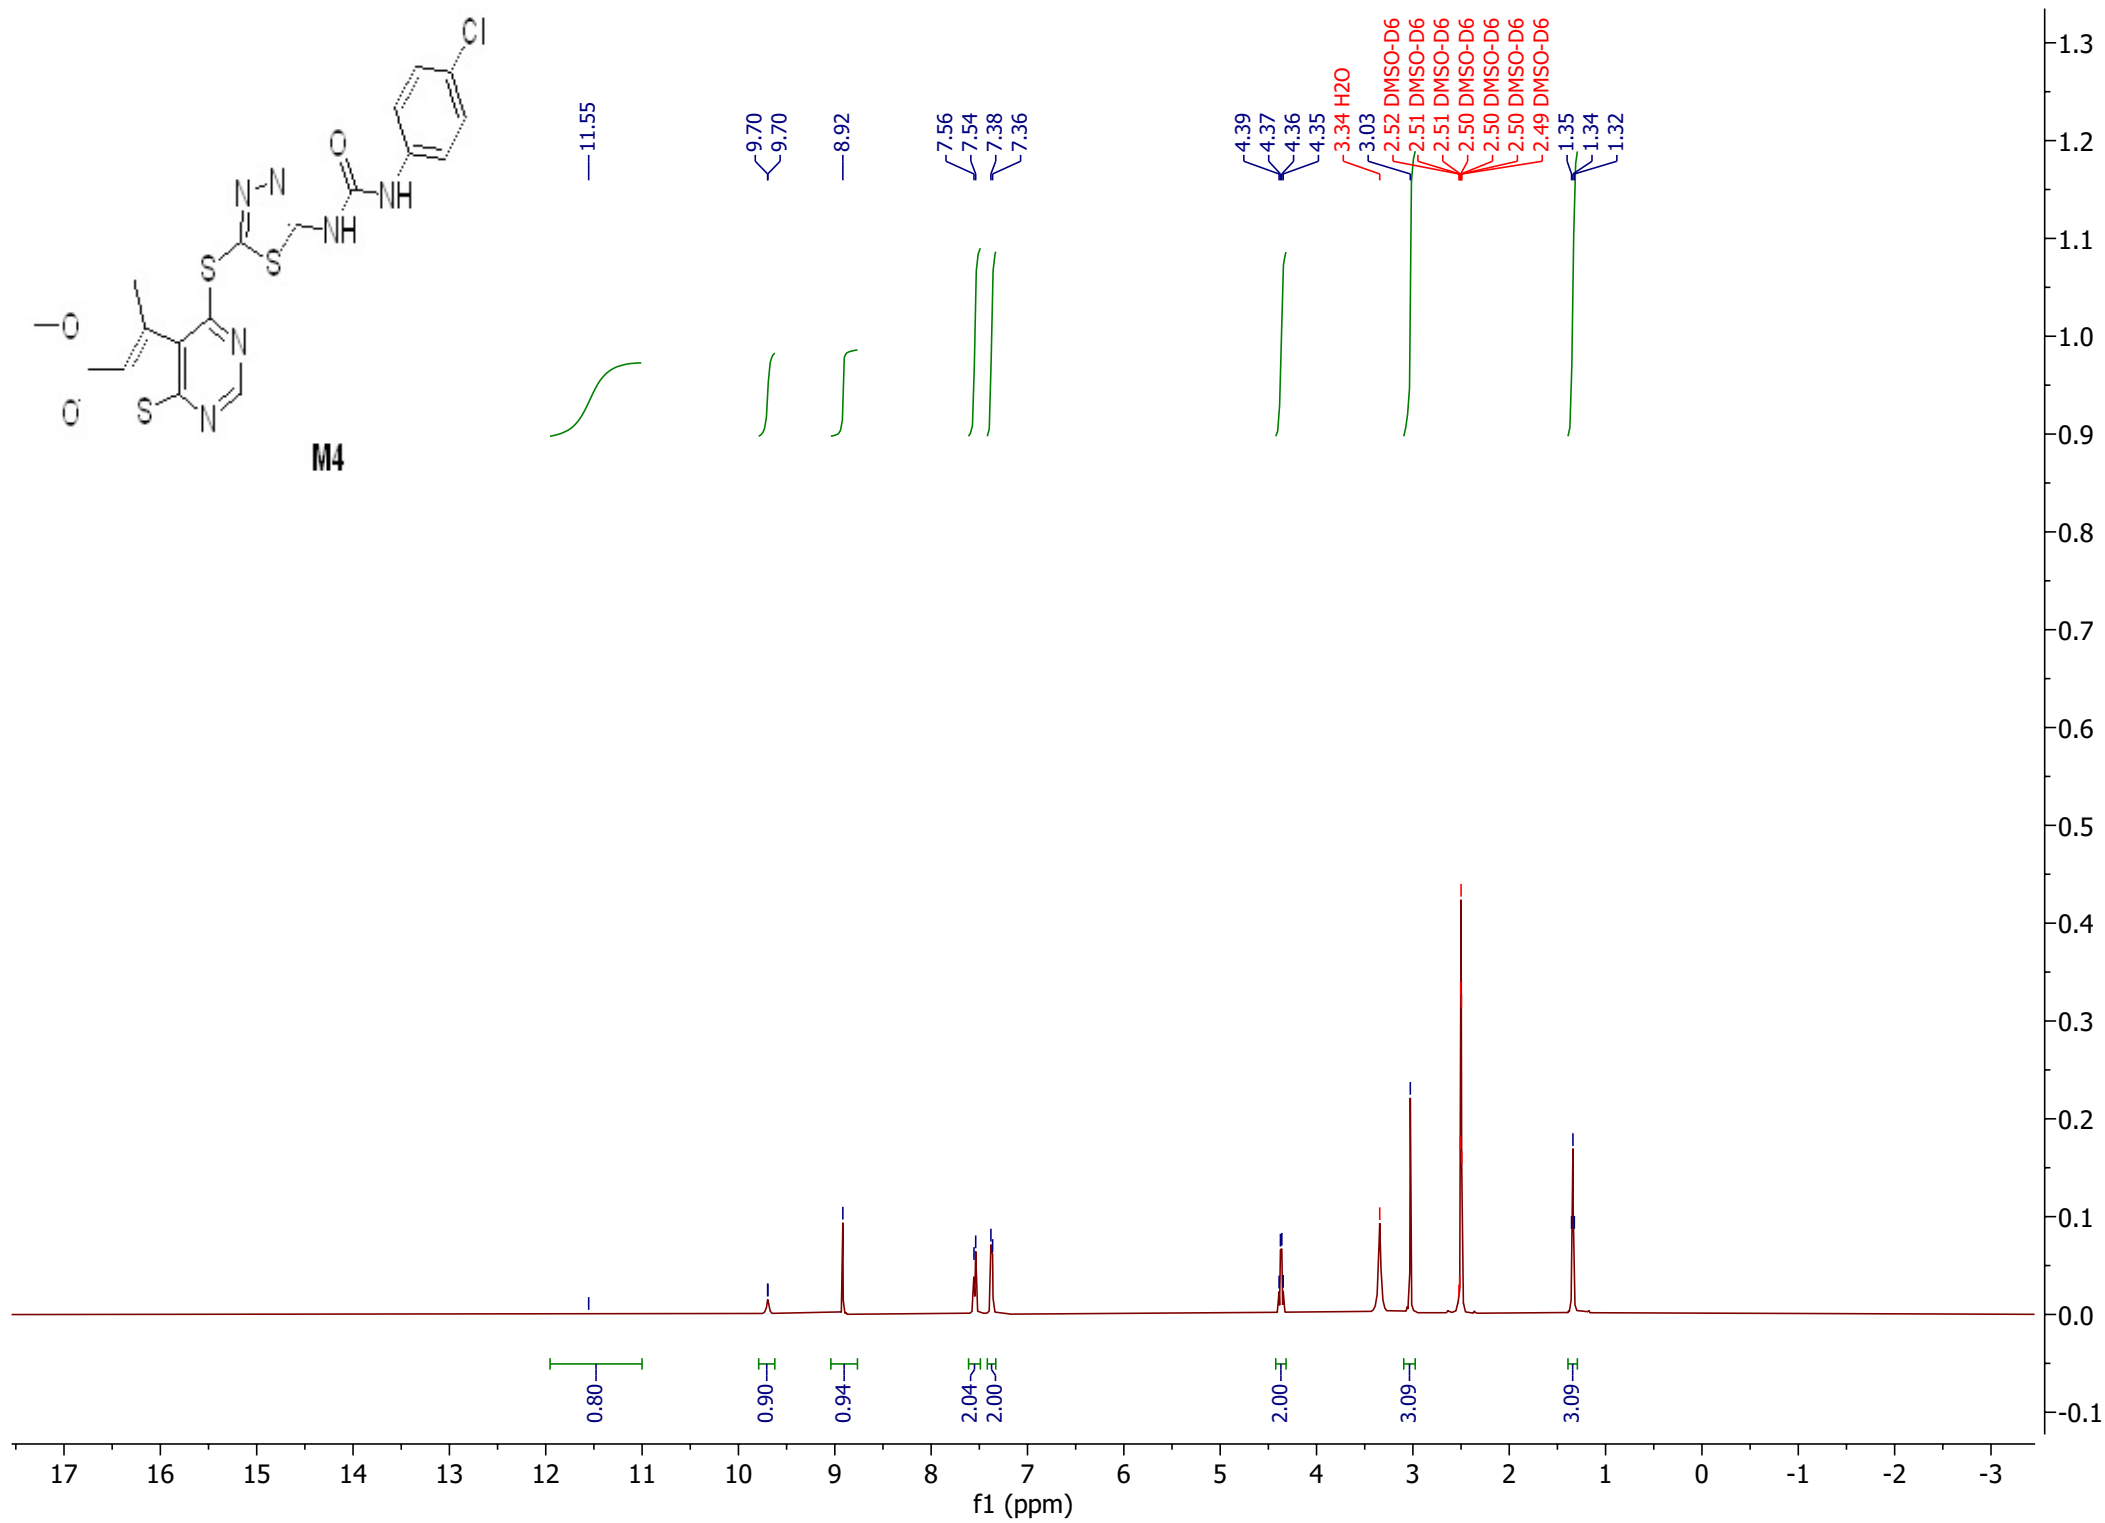

Eman Nasr\_F  
single\_pulse

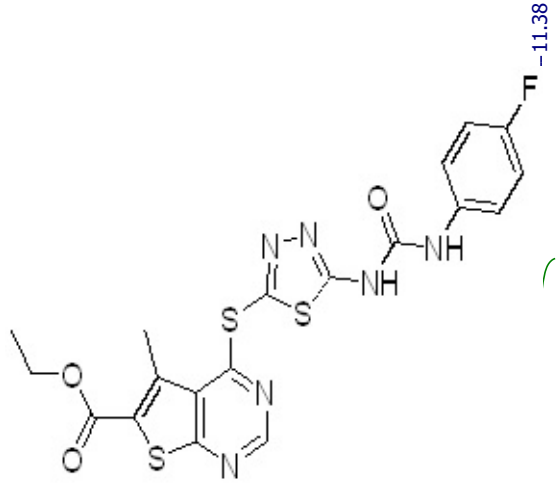

M5

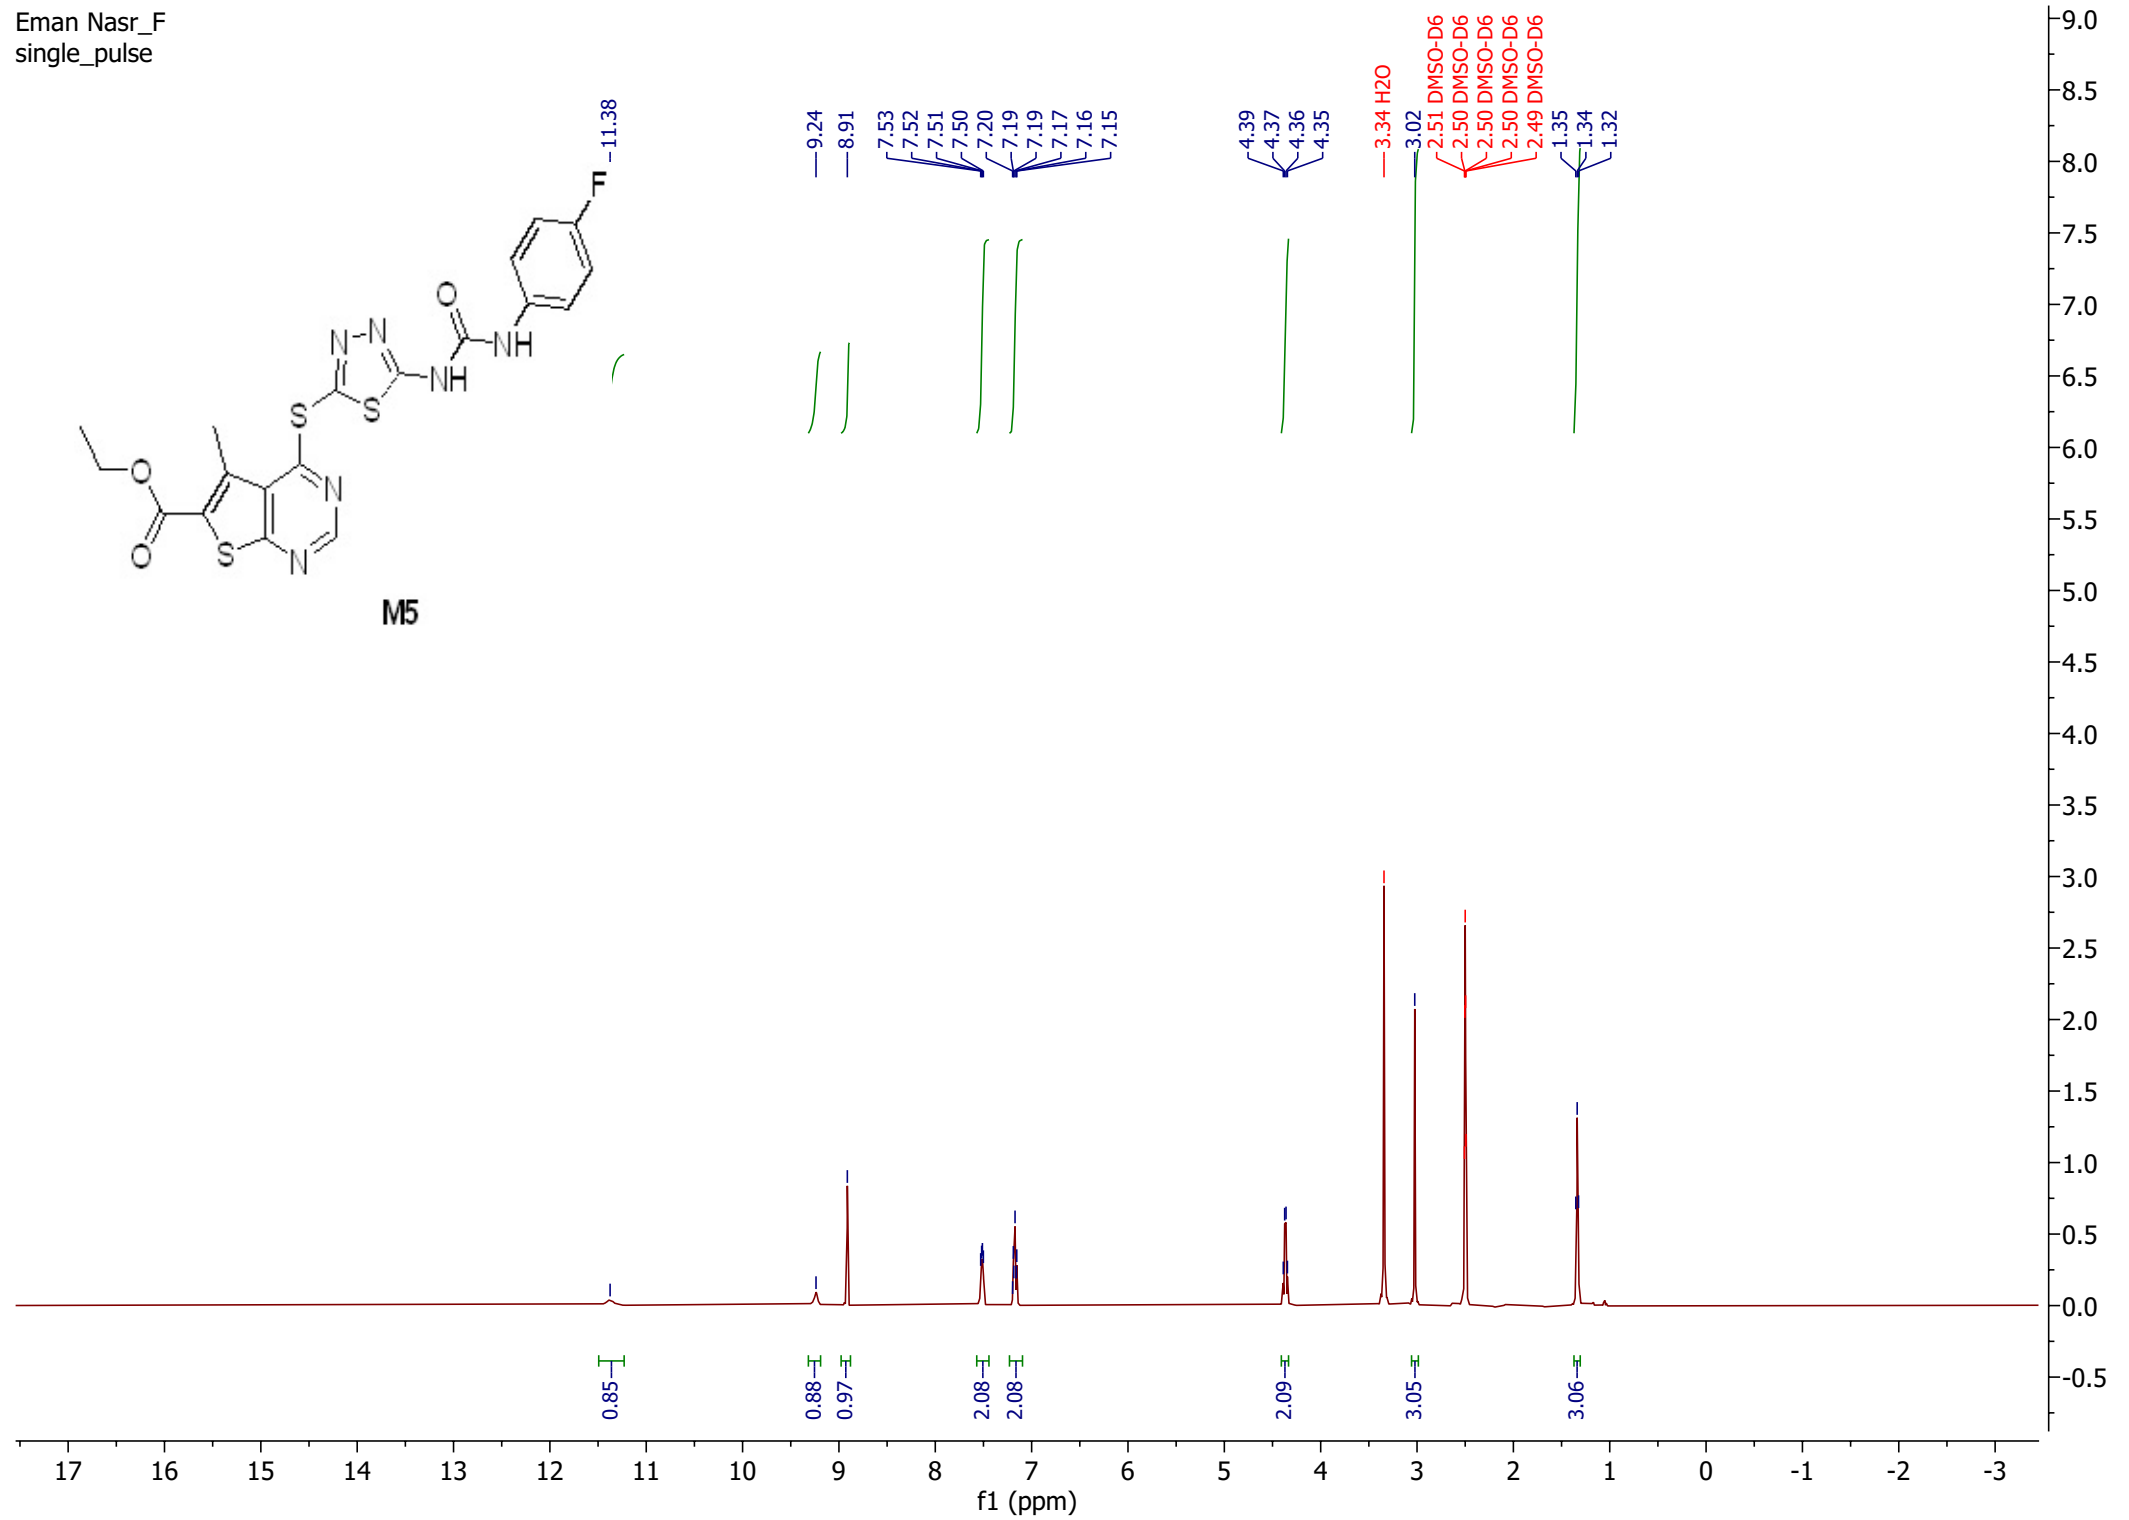

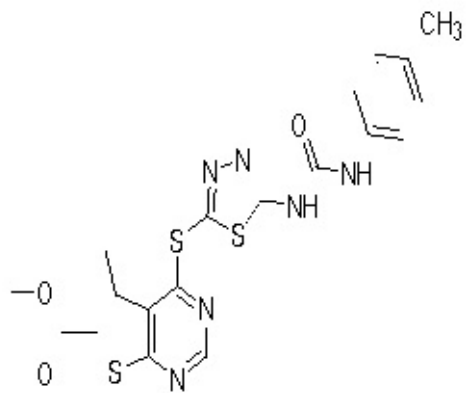

M1

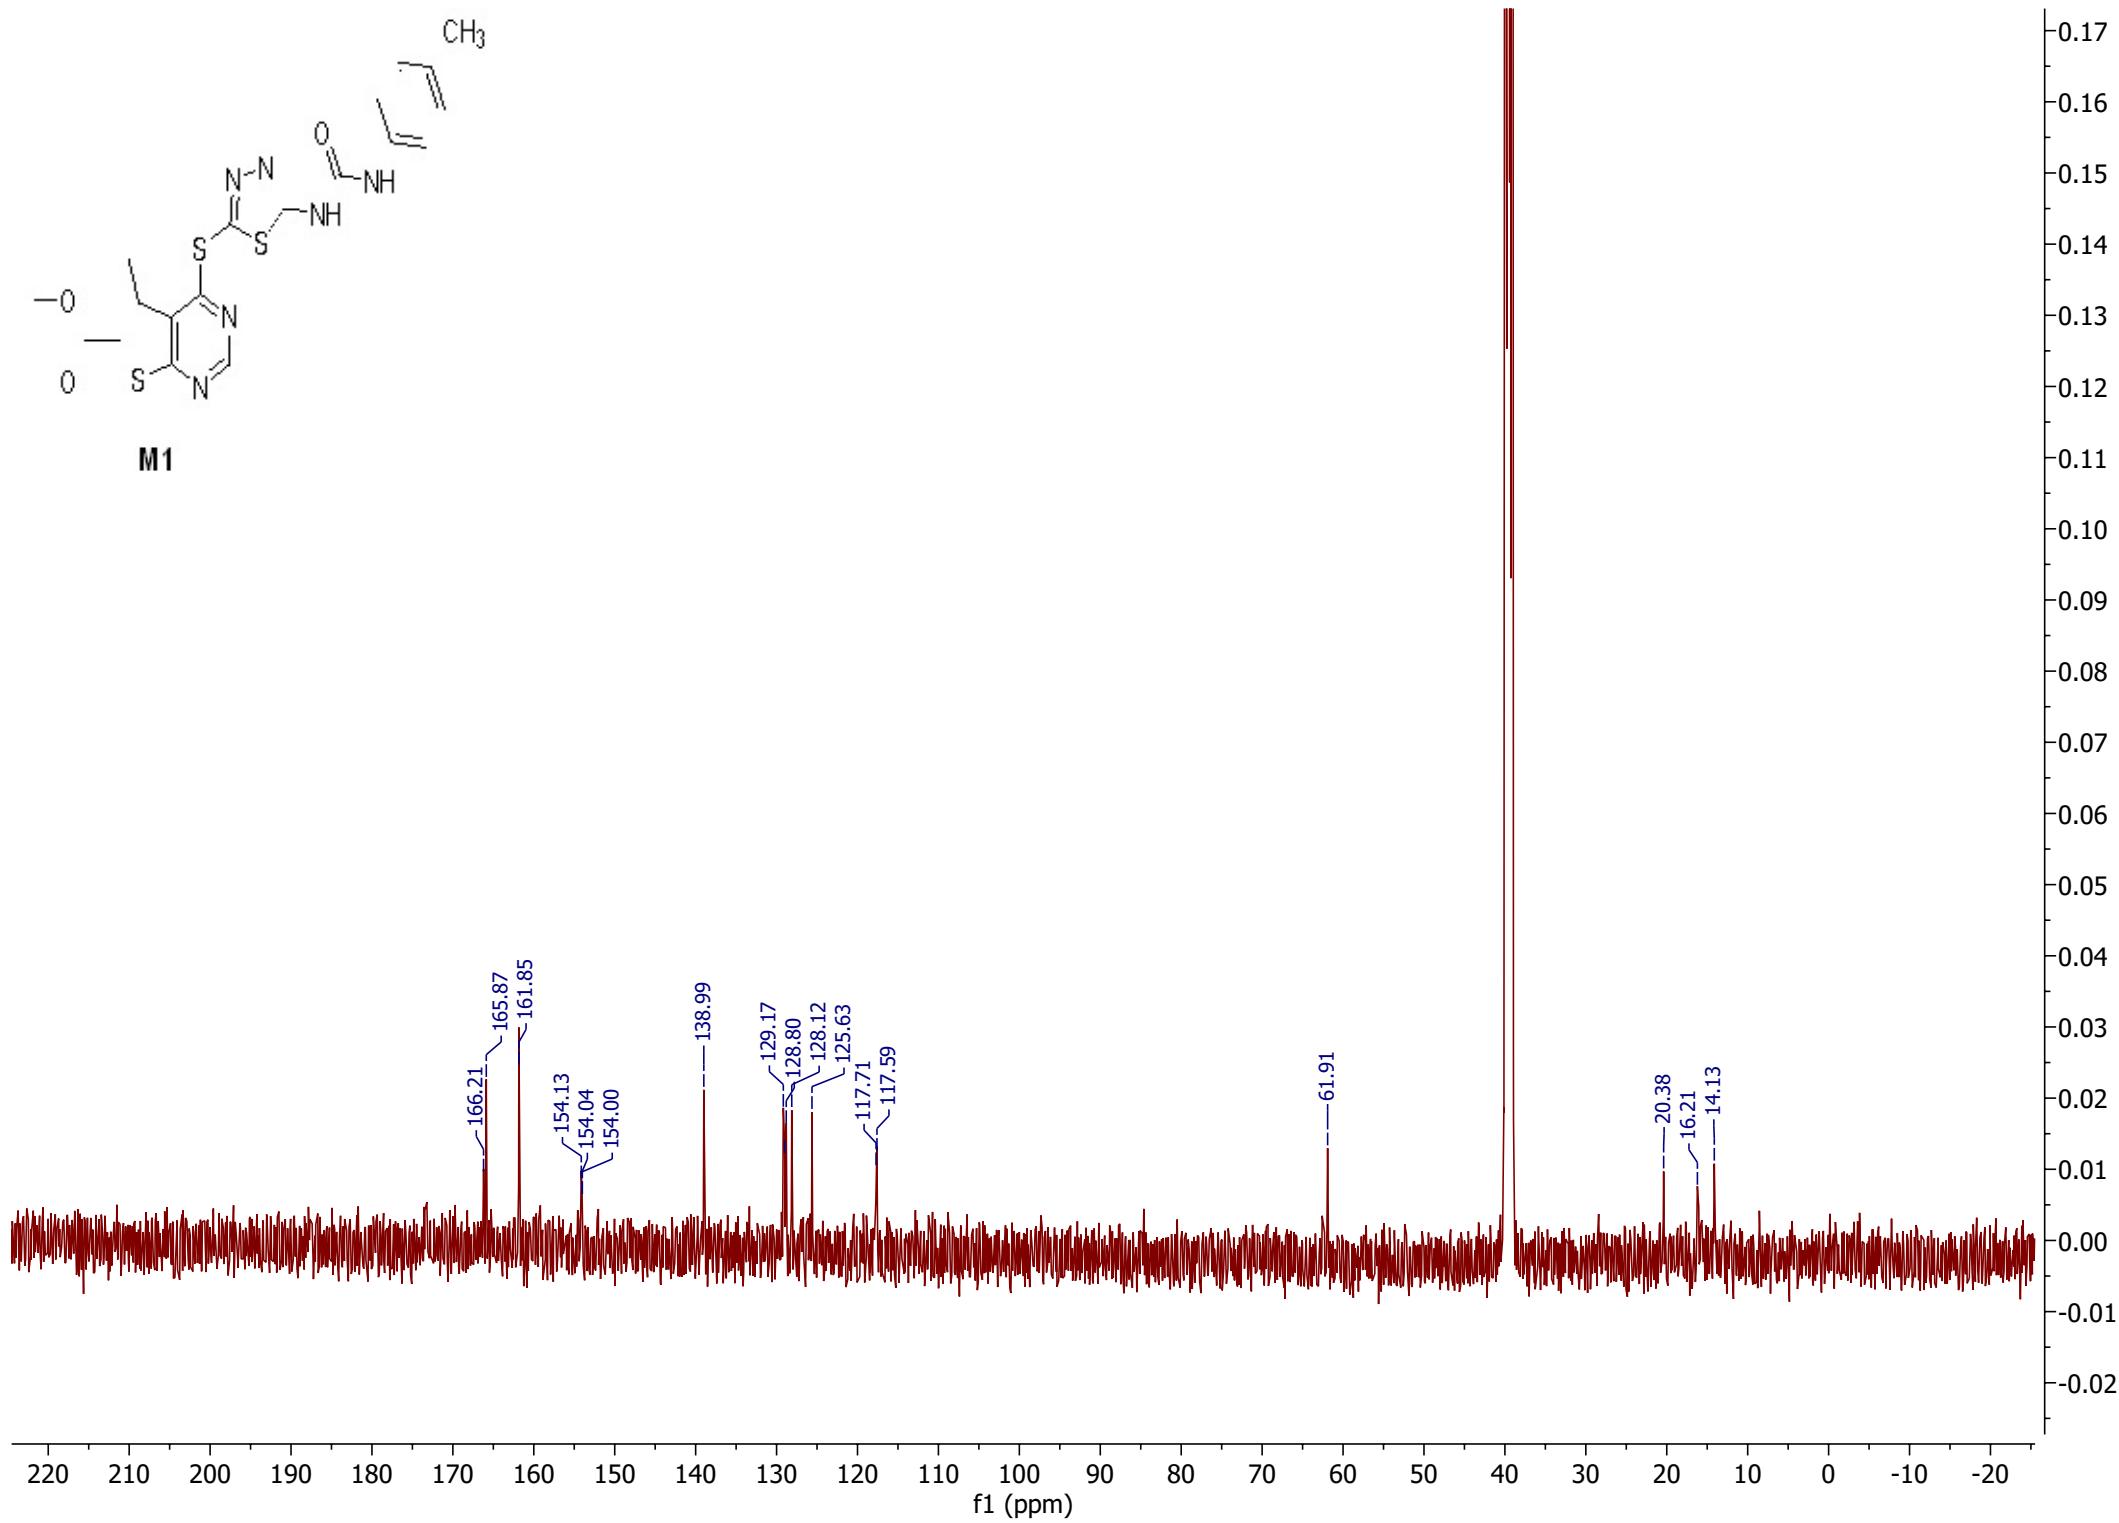

Eman Nasr\_OCH3  
single pulse decoupled gated NOE

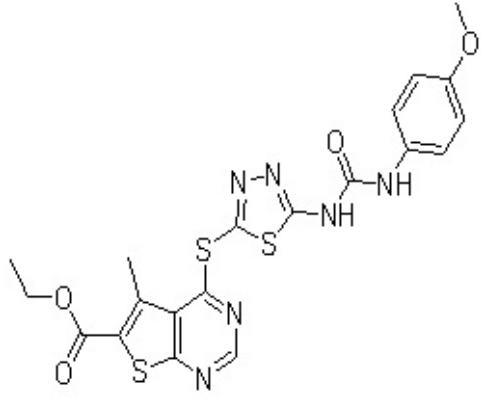

M2

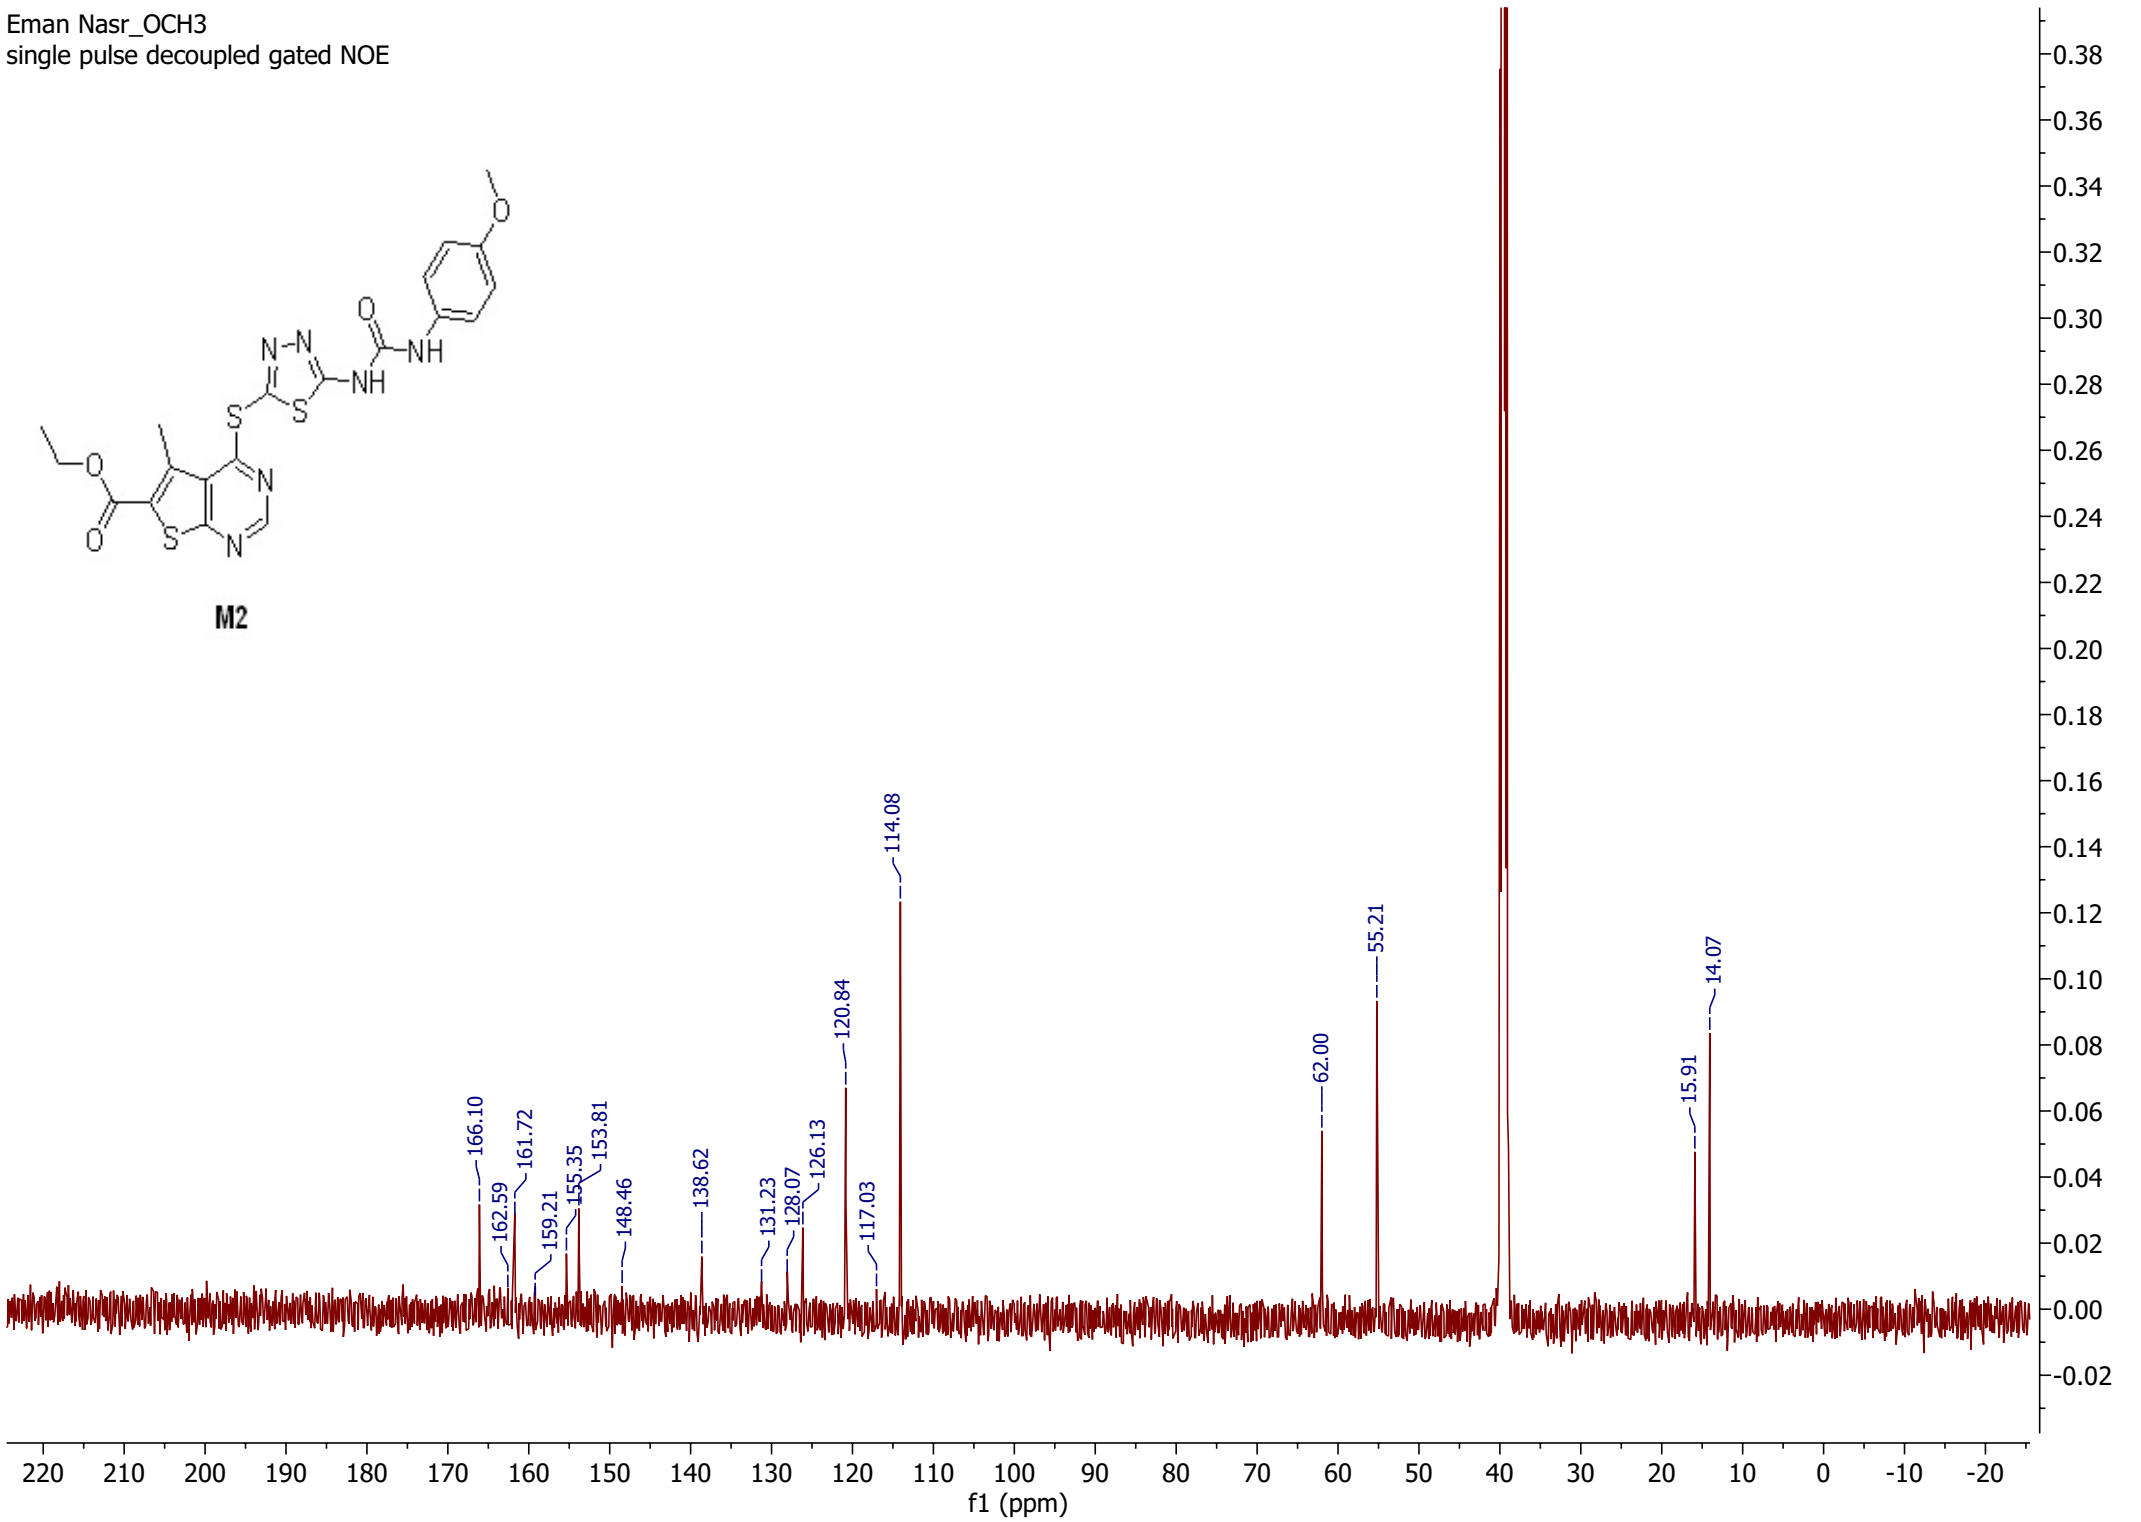

Eman Nasr\_SOVa  
single pulse decoupled gated NOE

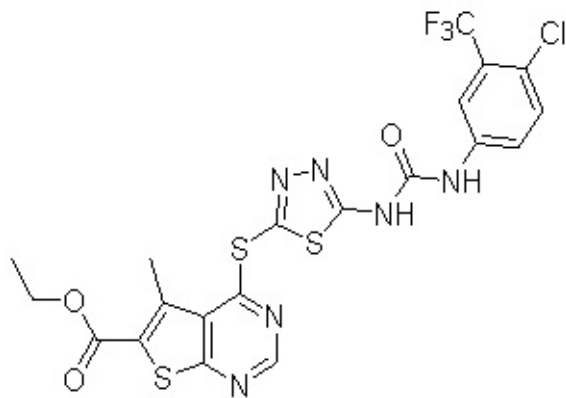

**M3**

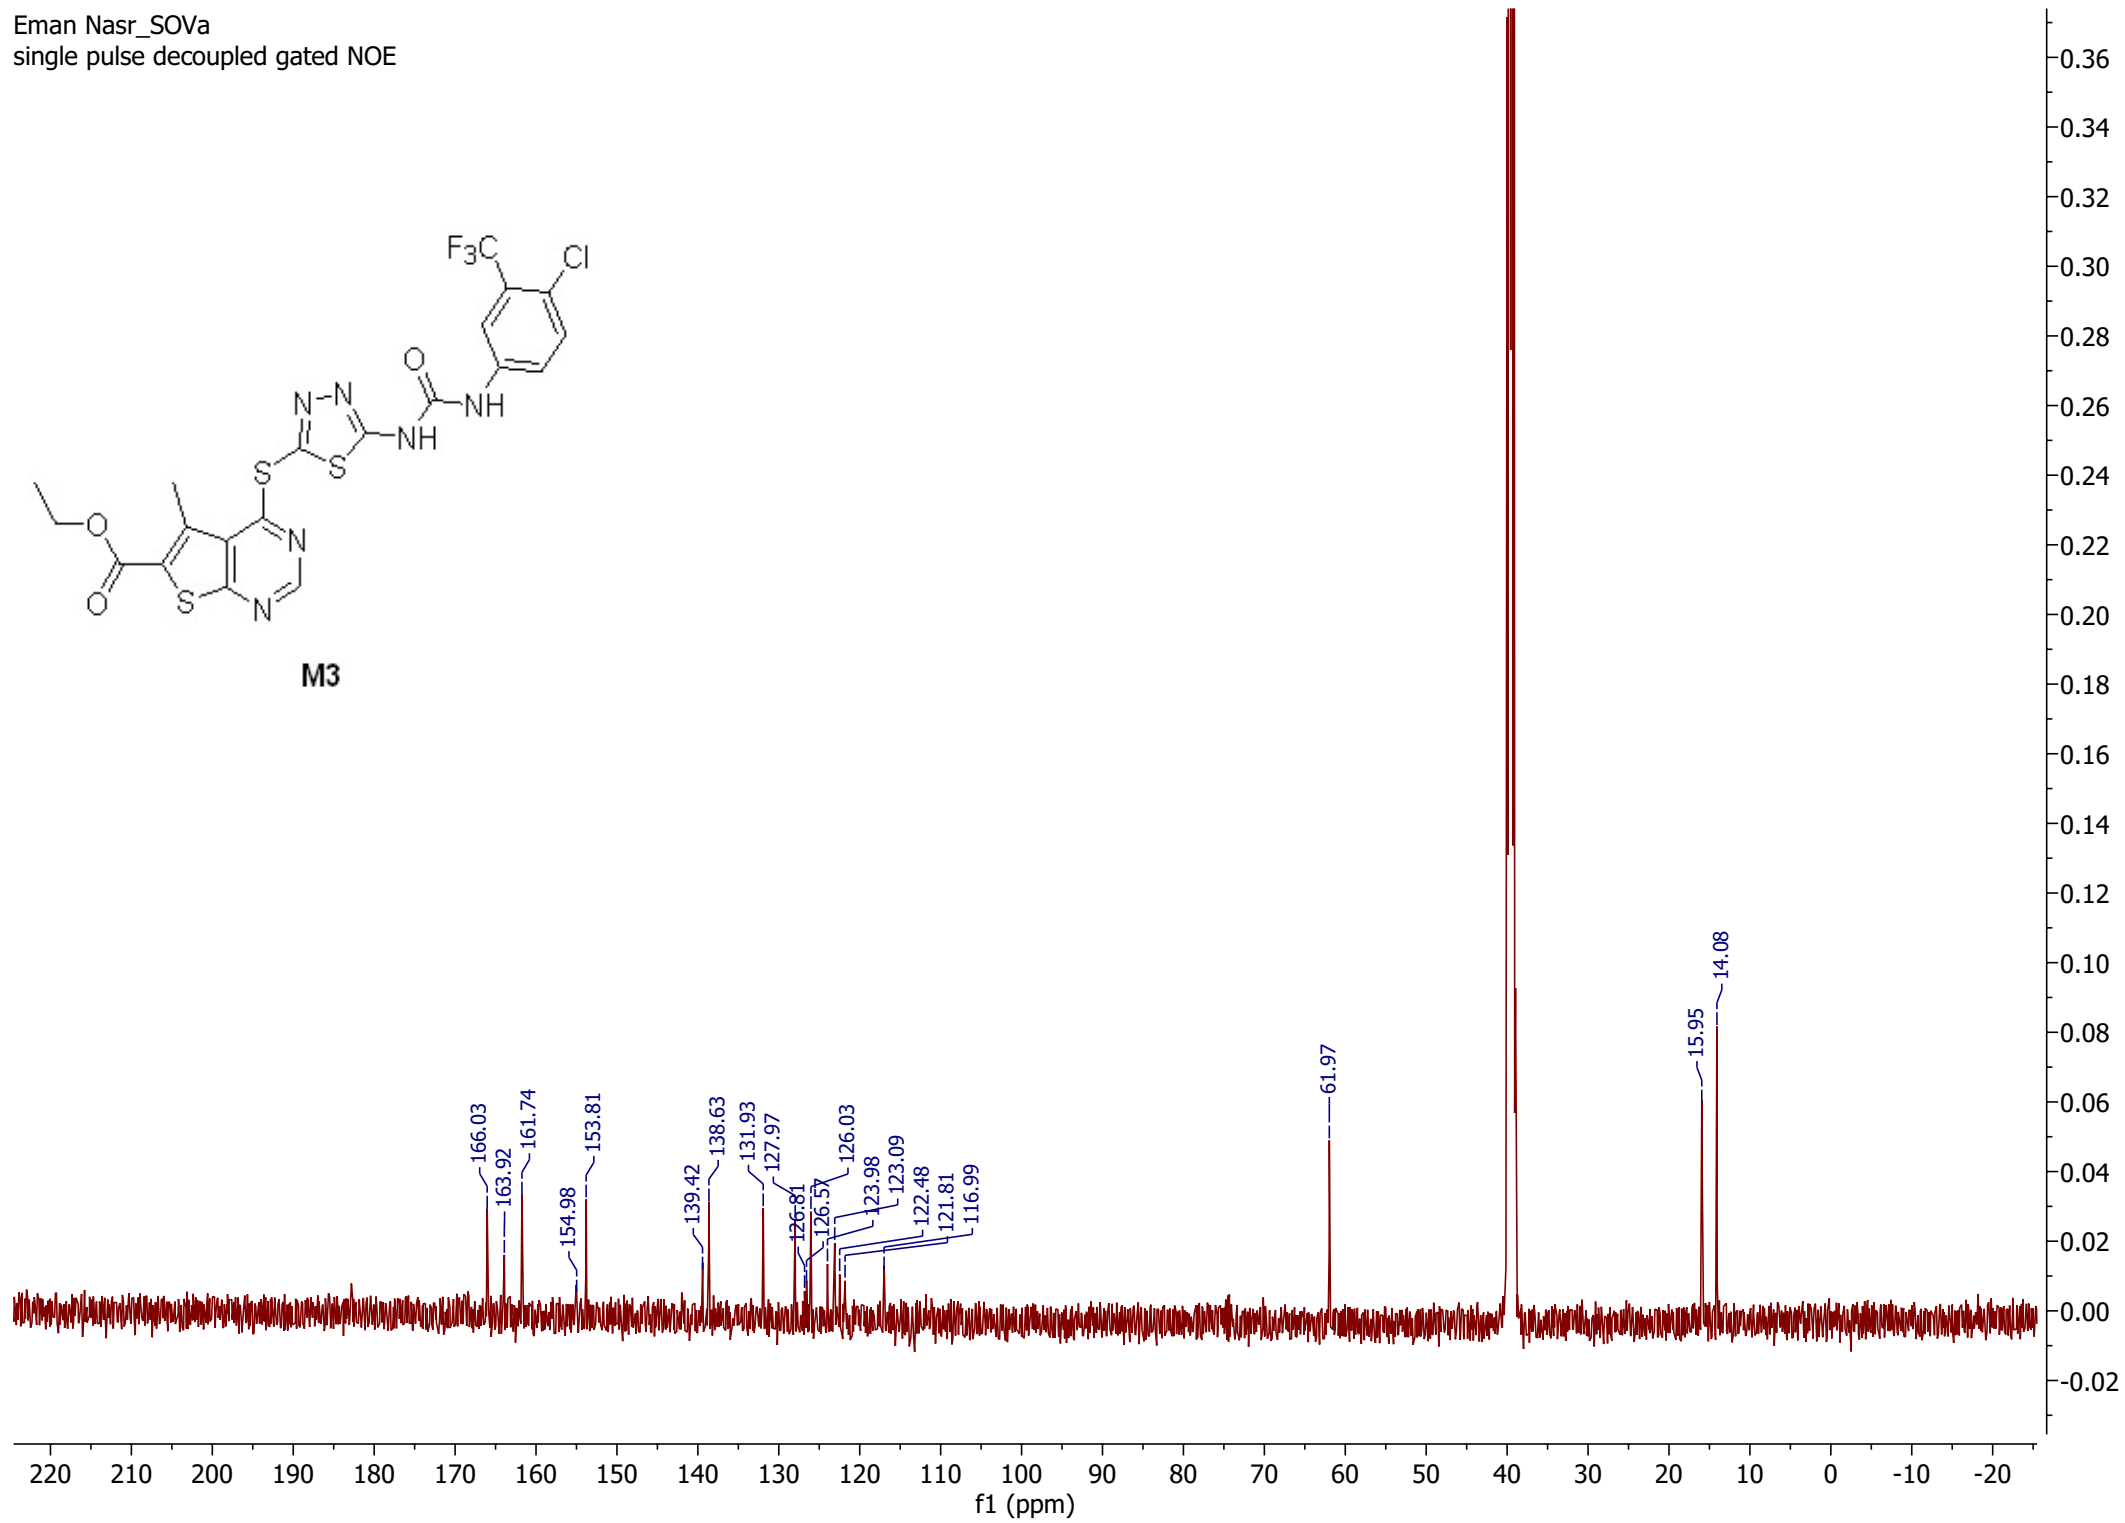

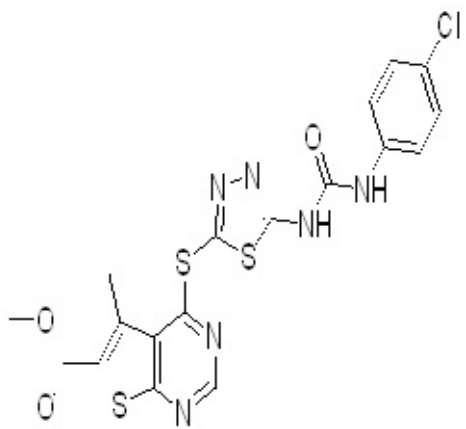

**M4**

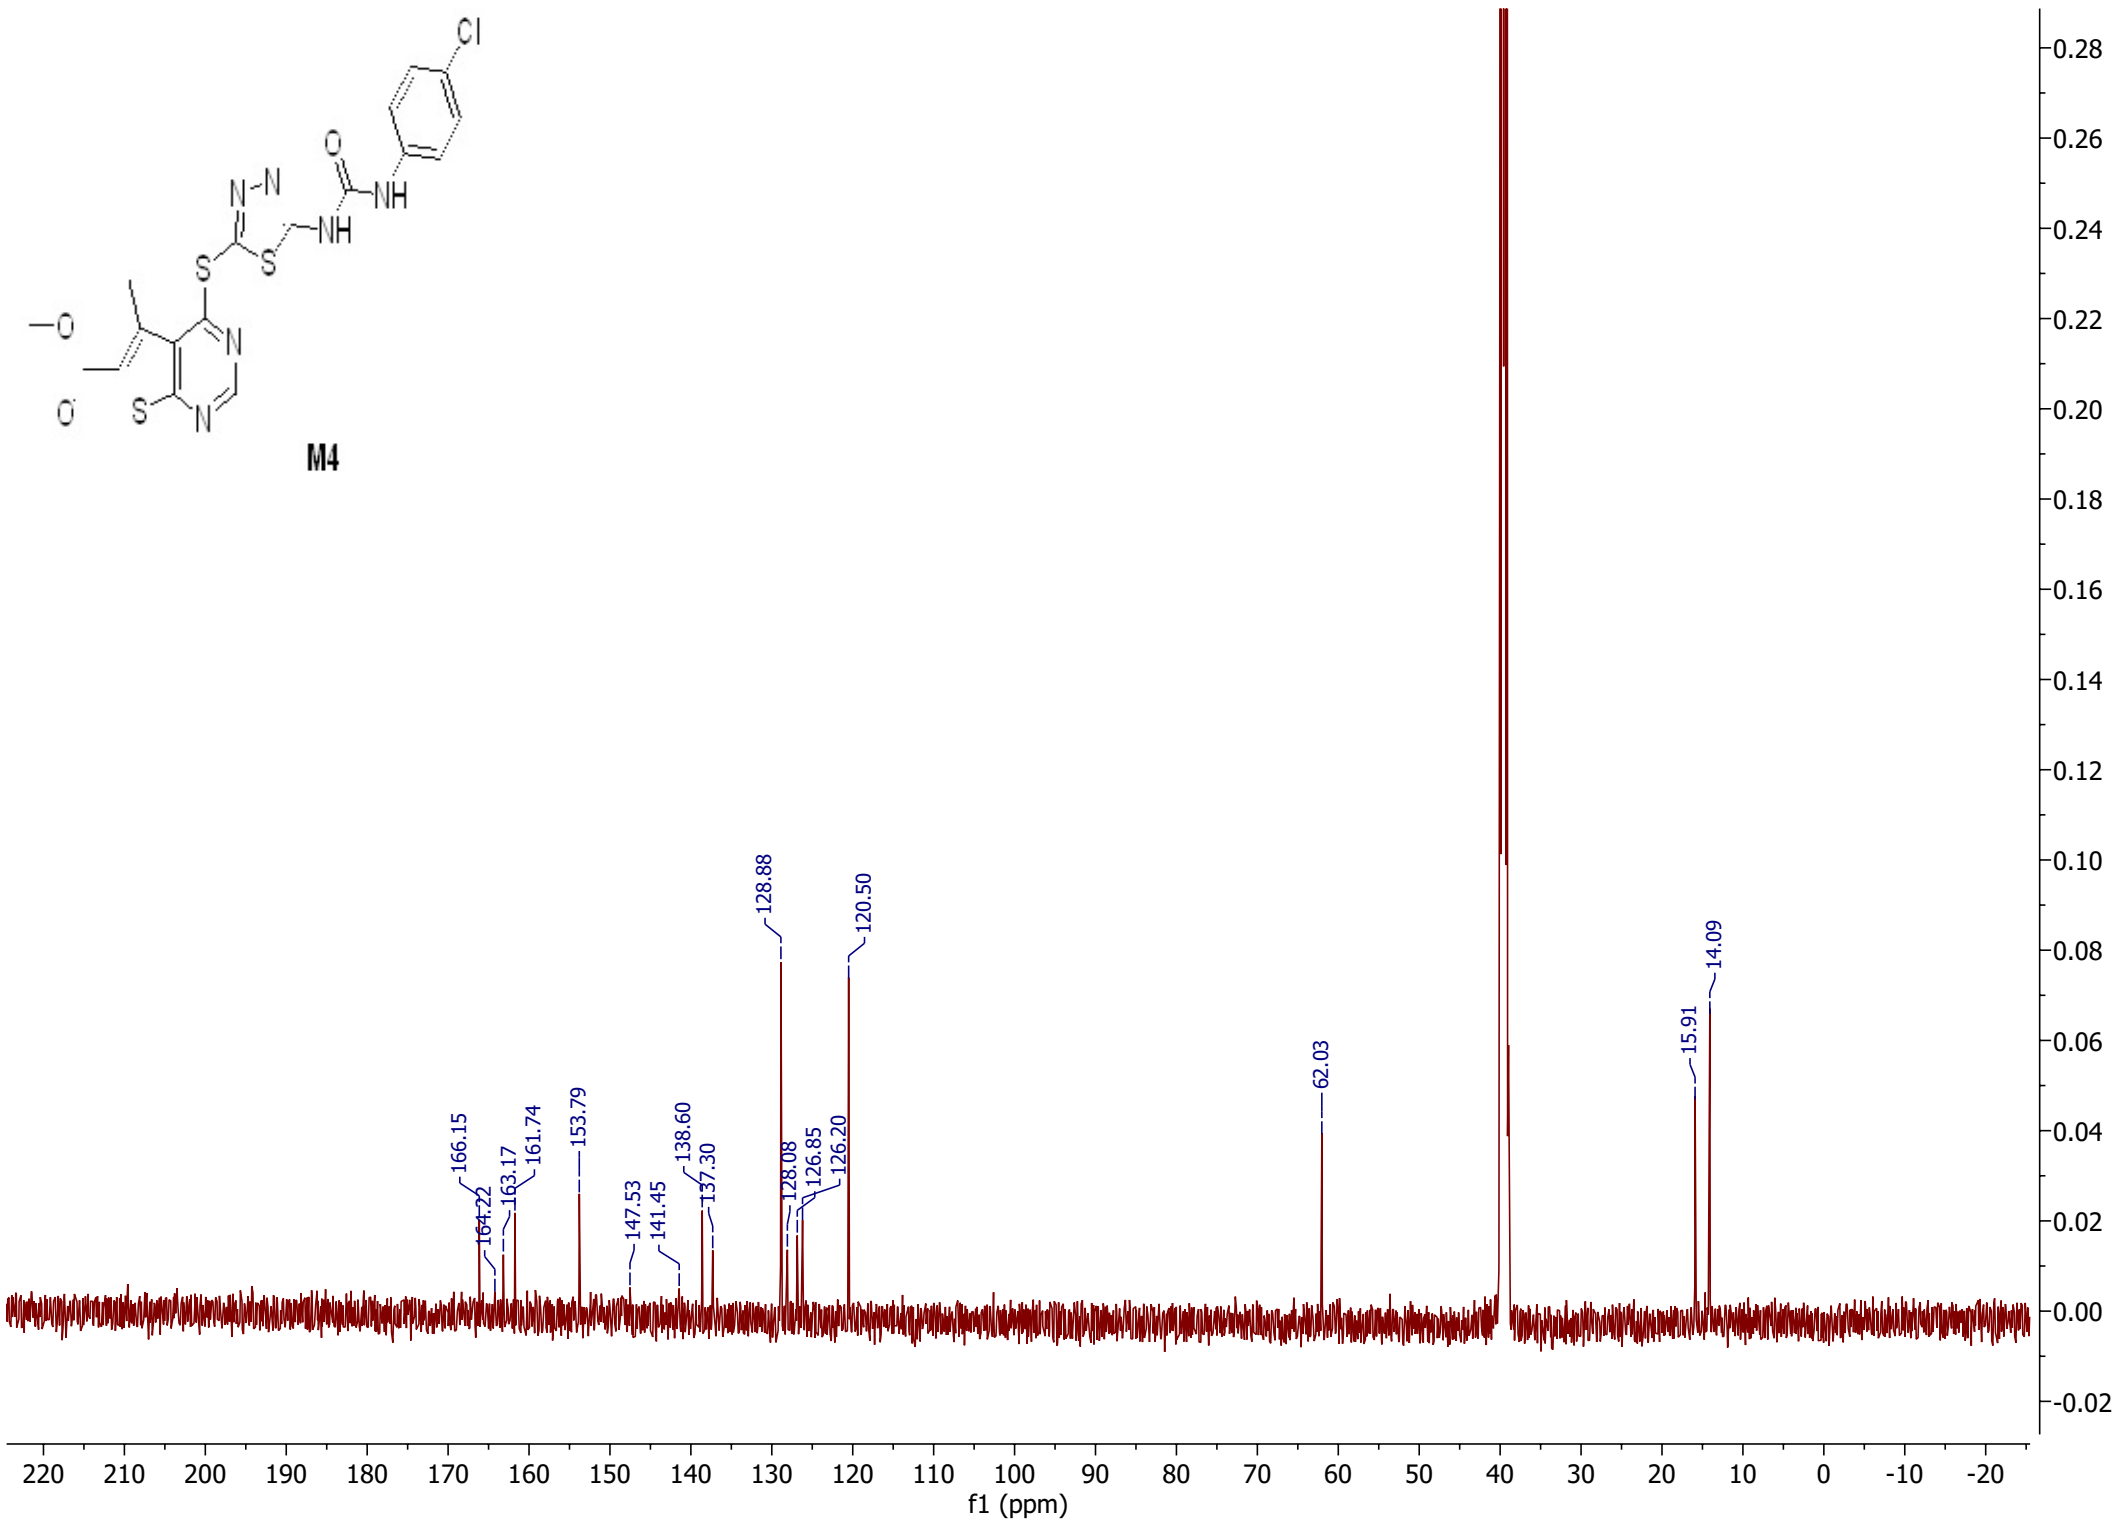

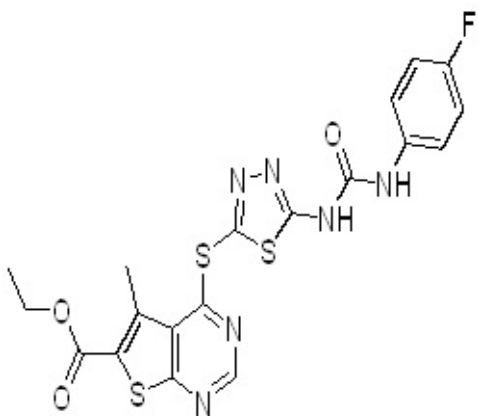

M5

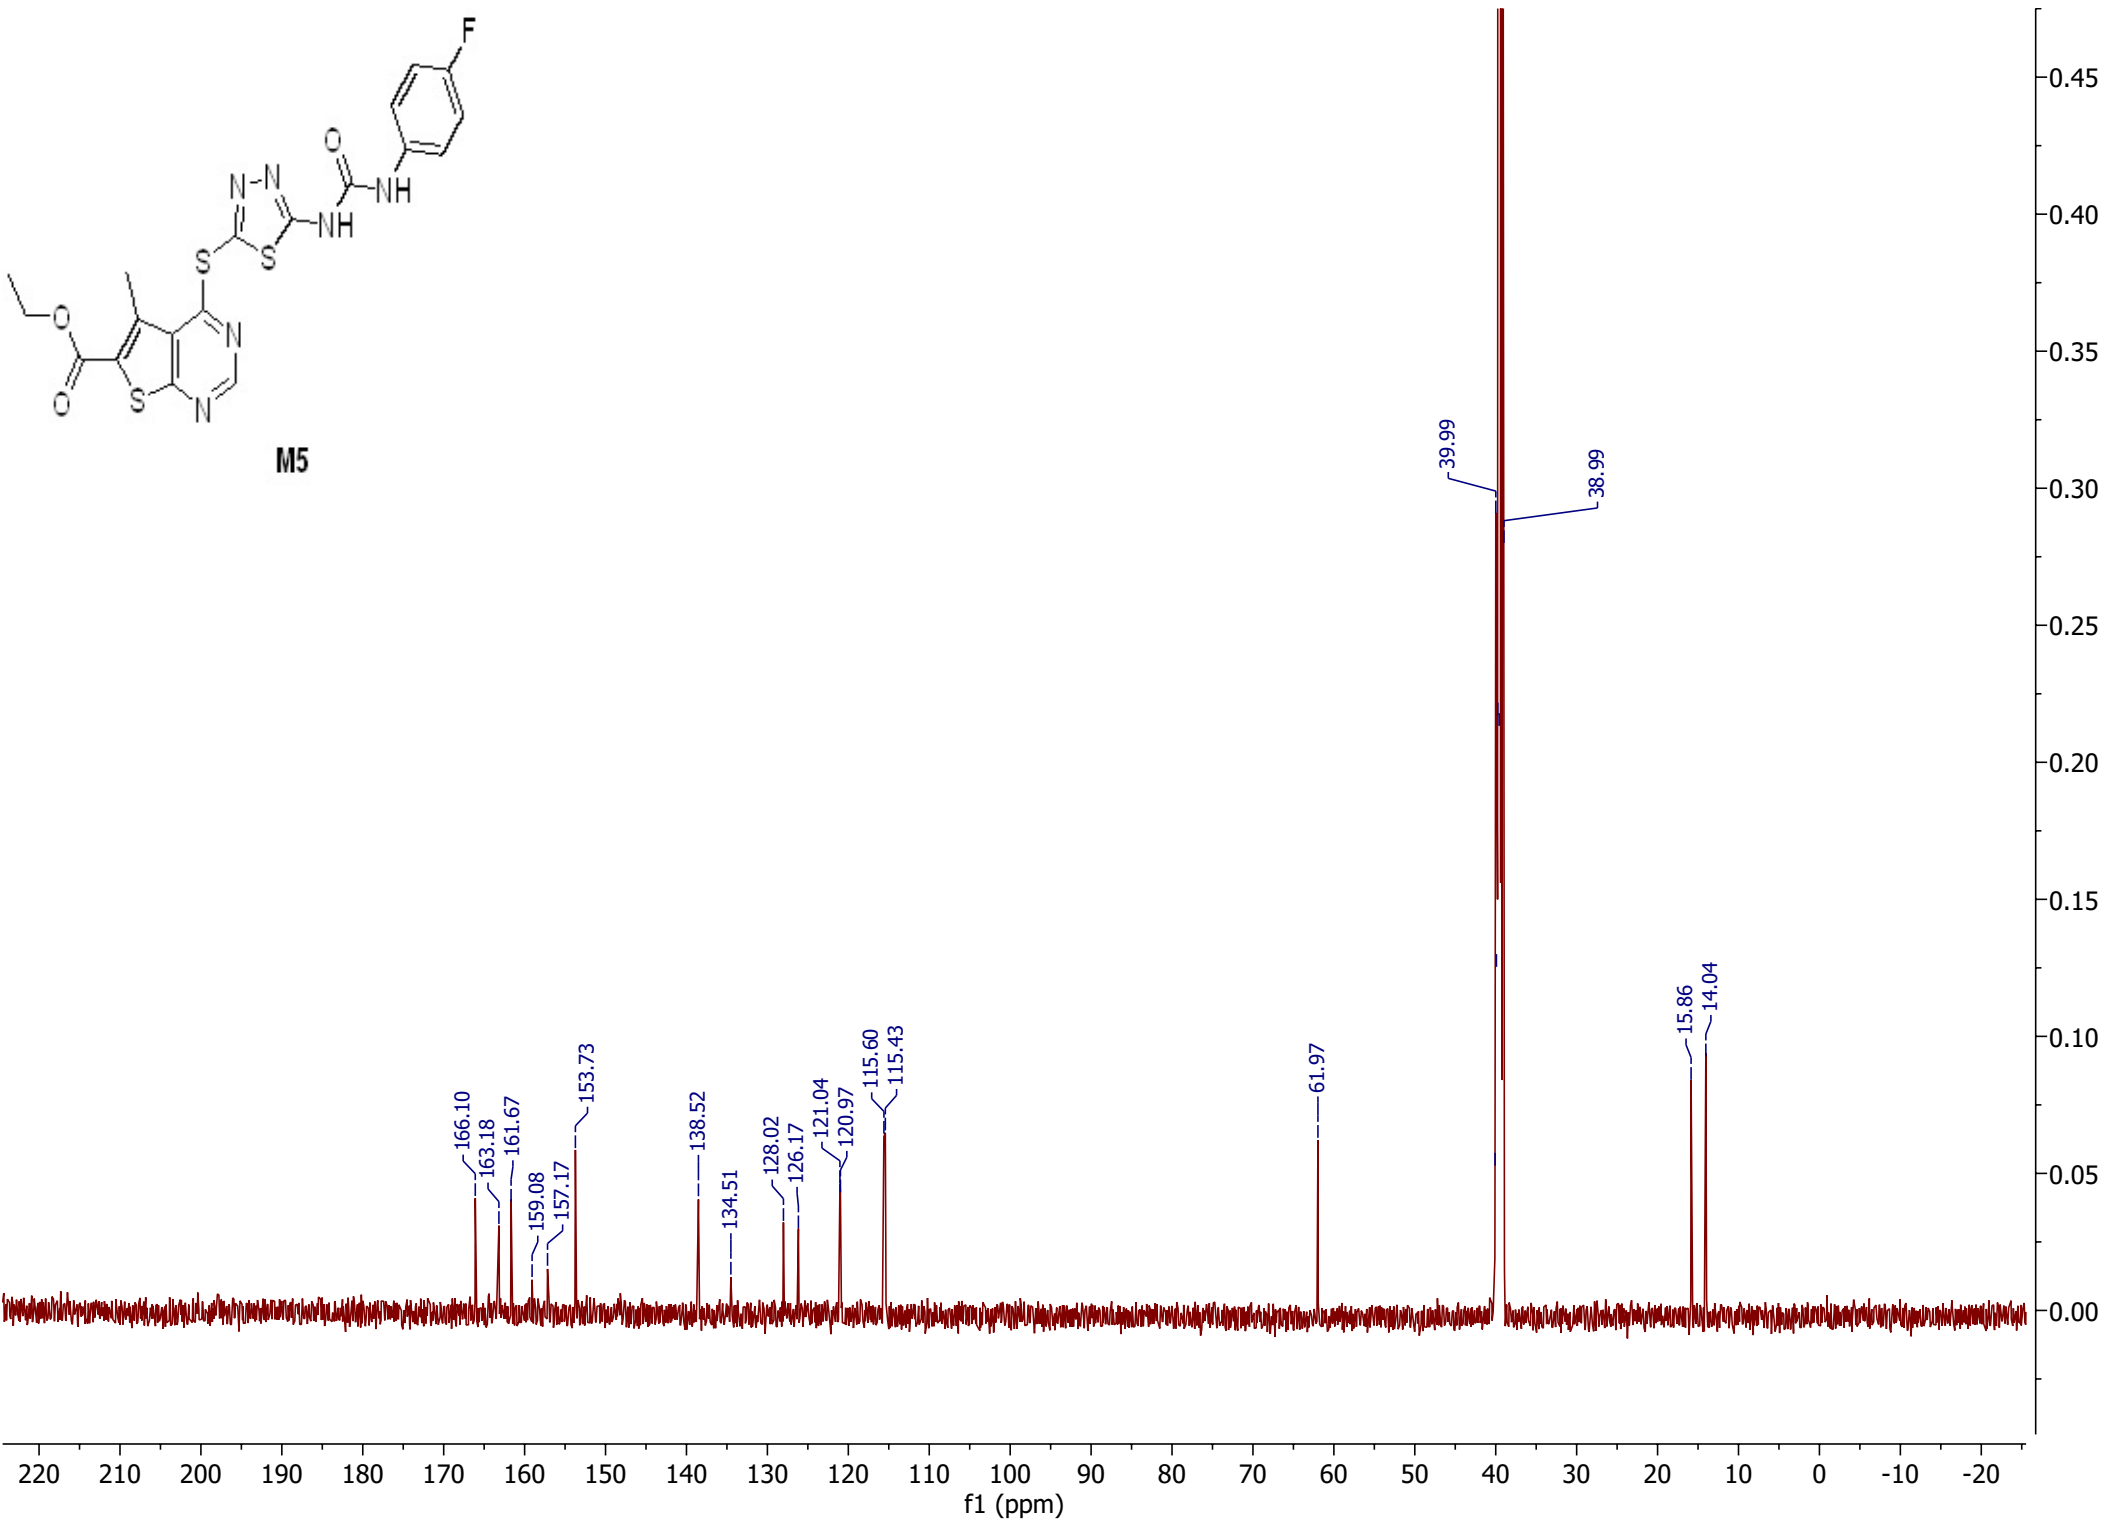

# VEGFR-2

| Best-fit values |         |
|-----------------|---------|
| LogIC50         | -1.092  |
| HillSlope       | -0.4078 |
| IC50            | 0.08098 |

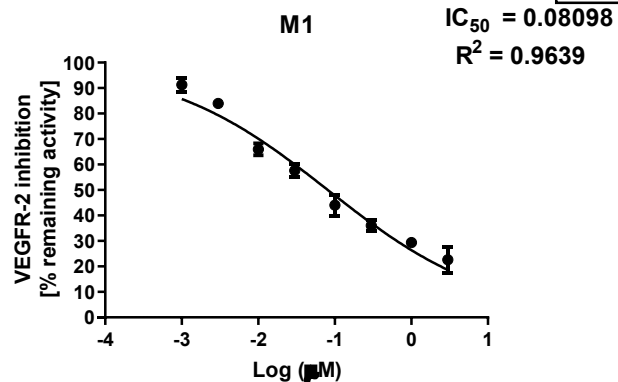

| Best-fit values |         |
|-----------------|---------|
| LogIC50         | 0.04985 |
| HillSlope       | -0.3571 |
| IC50            | 1.122   |

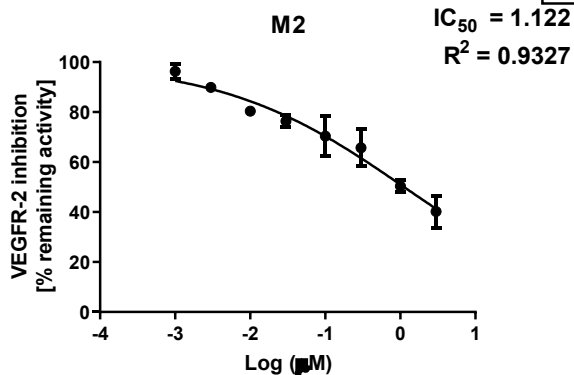

| Best-fit values |         |
|-----------------|---------|
| LogIC50         | 0.1133  |
| HillSlope       | -0.5549 |
| IC50            | 1.298   |

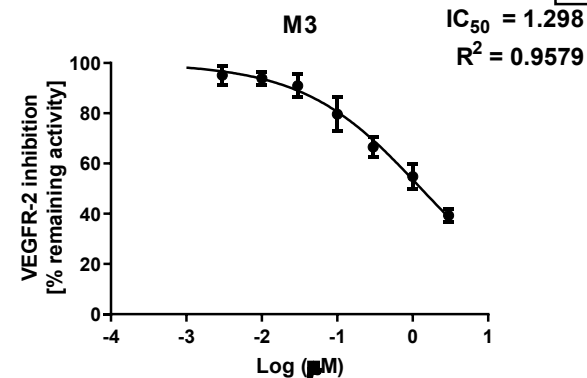

| Best-fit values |         |
|-----------------|---------|
| LogIC50         | 0.4741  |
| HillSlope       | -0.2885 |
| IC50            | 2.979   |

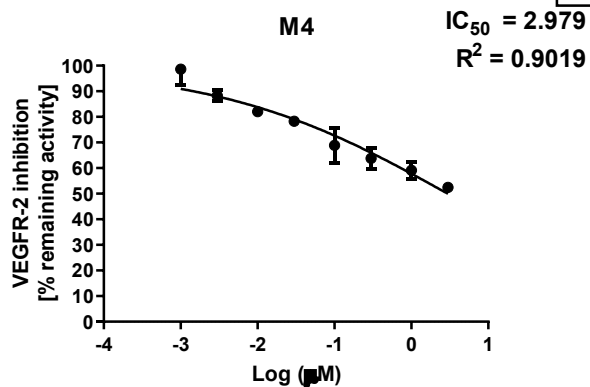

| Best-fit values |         |
|-----------------|---------|
| LogIC50         | -0.8485 |
| HillSlope       | -0.5487 |
| IC50            | 0.1417  |

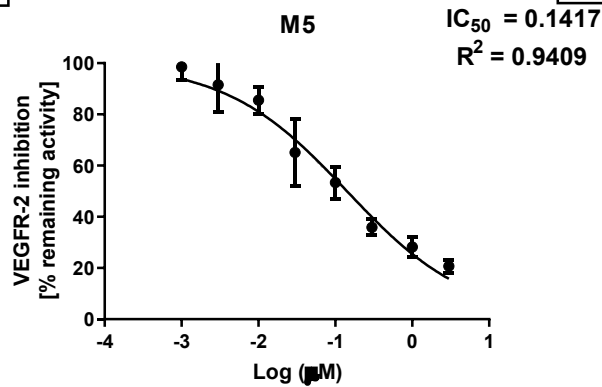

| Best-fit values |         |
|-----------------|---------|
| LogIC50         | -1.262  |
| HillSlope       | -0.4530 |
| IC50            | 0.05473 |

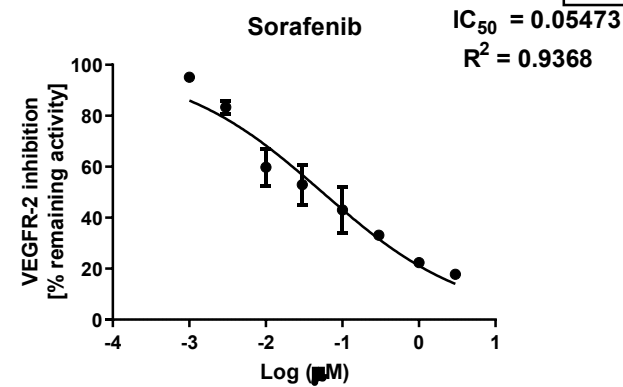

# Aurora-B

| Best-fit values |         |
|-----------------|---------|
| LogIC50         | -1.428  |
| HillSlope       | -0.3906 |
| IC50            | 0.03730 |

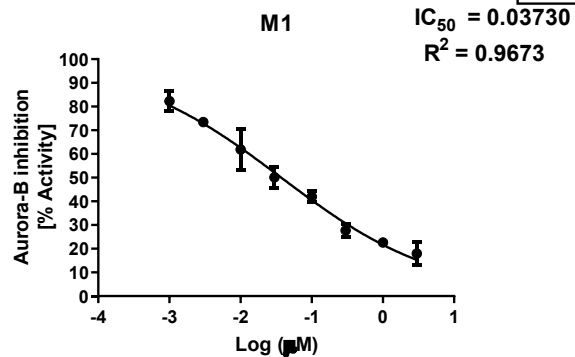

| Best-fit values |         |
|-----------------|---------|
| LogIC50         | -0.2766 |
| HillSlope       | -0.3646 |
| IC50            | 0.5290  |

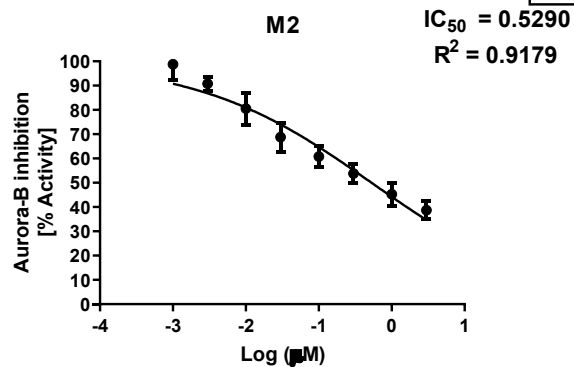

| Best-fit values |         |
|-----------------|---------|
| LogIC50         | 0.5403  |
| HillSlope       | -0.3664 |
| IC50            | 3.469   |

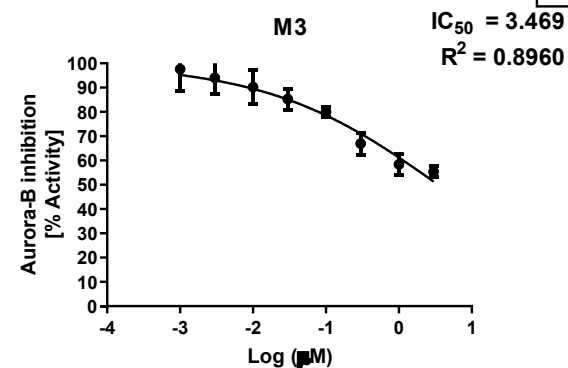

| Best-fit values |         |
|-----------------|---------|
| LogIC50         | 0.2236  |
| HillSlope       | -0.3593 |
| IC50            | 1.673   |

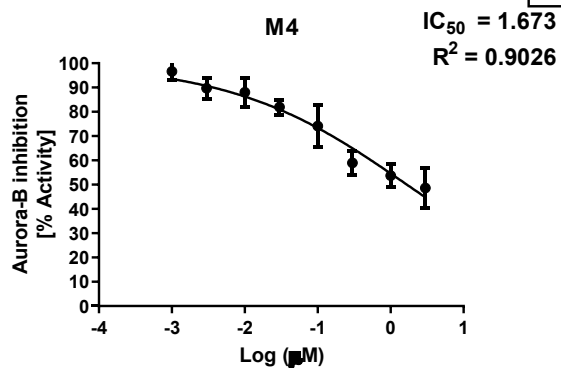

| Best-fit values |         |
|-----------------|---------|
| LogIC50         | -0.1518 |
| HillSlope       | -0.3916 |
| IC50            | 0.7050  |

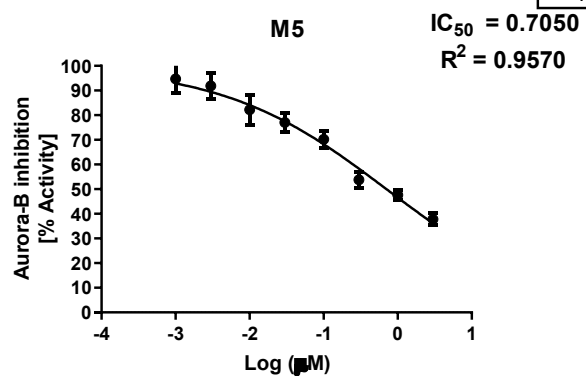

| Best-fit values |         |
|-----------------|---------|
| LogIC50         | -1.704  |
| HillSlope       | -0.4177 |
| IC50            | 0.01978 |

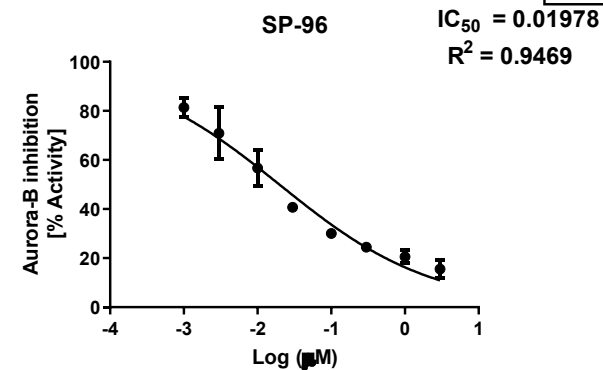

## ***In vivo* anti-breast cancer activity assay of compound M1 and its effect on the apoptotic marker (caspase-3) level**

### **Induction of breast cancer in experimental animals:**

Healthy 8-week-old Swiss albino female mice with a weight range (20 to 25 g) were provided by VACSERA, Cairo, Egypt. The mice were housed in a temperature-controlled (~20–22 °C) specific pathogen-free animal room with a 12 h light/12 h dark cycle and received food and water *ad libitum*. The experimental design was approved by Mansoura University Animal Care and Use Committee (MU-ACUC) in accordance with ARRIVE guidelines for animal experimentation. Breast cancer was induced by a single dose of 7,12-dimethylbenz[a]anthracene, intraperitoneally daily for 20 days. Mice tumor volume and body weight were monitored in the 2<sup>nd</sup> to 5<sup>th</sup> groups every five days. The tumor volume was measured via a digital vernier caliper.

### **Experimental design**

Twenty 8-week-old Swiss albino female mice were randomly divided into five groups (five mice/group) as follows:

- Control group (received an equivalent volume of physiological saline);
- DMBA-induced group (received an equivalent volume of physiological saline)
- M1-treated group (injected intraperitoneally with ethyl 5-methyl-4-((5-(3-(p-tolyl) ureido)-1,3,4-thiadiazol-2-yl) thio) thieno [2,3-d] pyrimidine-6-carboxylate (**M1**) (10 mg/kg)).
- Dox-treated group (injected intraperitoneally with DOX (2 mg/kg)
- At the end of the experiment, all mice were anaesthetized and euthanized. Breast tissue tumor from all groups and corresponding control was dissected out, washed, and fixed in 10% formalin buffered and neutral solution for 72 hrs and processed for histopathological and immunohistochemical examination.

### **Histopathological examination**

Formalin-fixed breast tissue was washed and processed in ascending graded ethanol, then processed using the paraffin embedding technique. Four µm-thick paraffin sections were further

processed to be stained with hematoxylin and eosin (H&E) stain for general histopathological evaluation [1].

### **Immunohistochemical analysis**

According to manufacturers' reconstructions and following [2]. Four  $\mu\text{m}$ -thick tissue sections were processed in xylene, antigenic retrieval in citrate buffer (10 mM at pH 6.0), endogenous peroxidase blocking in 3% hydrogen peroxide, and nonspecific reactions blocked in 10% normal goat serum. Incubation with primary antibody of against active caspase 3 Cleaved Caspase-3 (Asp175) (5A1E) rabbit mAb (Catalog No# 9664; Cell Signaling Technology, Danvers, Massachusetts, USA) at 4°C overnight was followed by polyvalent and HRP labeled secondary antibodies and DAB immunoreaction was labelled with 3, 3'-diaminobenzidine tetrahydrochloride chromogen, counterstained with Mayer's hematoxylin were doubled blinded examined and captures with Olympus BX51 microscope under the same exposure setting conditions.

**Histomorphometric analysis:** We used a Leica microscope (Dm 3000, Leica, Germany) and the computer package suite Leica LAS EZ (LAS EZ V 3.4.0, Germany) to scan and capture images of the breast tissue sections. Morphometrical analysis of active caspase-positive cells (in 18 high-power fields, at the magnification of x400) using the image's J analyzer computer software (IMAGE J/FIJI 1.46r, National Institutes of Health).

**Statistical analysis:** Statistical comparison (Analysis of variance, ANOVA) among groups was performed using GraphPad Prism 8 analysis software (Graph-

Pad, San Diego, CA, USA) for Windows. The values were defined as statistically significant as  $p < 0.05$  and were represented by mean  $\pm$ SE for each group of the recordings reported by two observers.

### **Western Blot Protocol for Bax, Bcl-2, and $\beta$ -actin in MDA-MB-231 Cells**

#### **I. Experimental Design & Sample Preparation**

##### **Cell Culture & Treatment**

- **Cell Line:** MDA-MB-231 (triple-negative breast cancer cells)
- **Culture Conditions:** DMEM + 10% FBS + 1% penicillin/streptomycin at 37°C, 5% CO<sub>2</sub>
- **Treatment:** Seed cells at  $2 \times 10^6$  cells per 100 mm dish. Treat with compound at optimized concentration (include dose-response pilot). Include vehicle control (e.g.,

DMSO  $\leq$ 0.1%). Harvest after 24-48 hours (time-course dependent on compound mechanism).

- **Replicates:** Minimum n=3 biological replicates per group.

---

## II. Reagents & Commercial Kits

### Lysis Buffer Kit

- **Recommended: RIPA Lysis Buffer Kit** (Thermo Fisher Scientific, #89900)
  - Includes: RIPA buffer, protease inhibitor cocktail (add 1:100), phosphatase inhibitors (if studying phosphorylation).

### Protein Quantification

- **Kit: Pierce™ BCA Protein Assay Kit** (Thermo Fisher Scientific, #23225)

### Electrophoresis & Transfer

- **Precast Gels: 4-20% Mini-PROTEAN® TGX™ Precast Gels** (Bio-Rad, #456109)
- **Transfer System: iBlot™ 2 Transfer System** (Thermo Fisher Scientific) with iBlot™ 2 Transfer Stacks, PVDF, regular size (0.2  $\mu$ m, #IB24002)

### Blocking & Detection

- **Blocking Buffer: EveryBlot Blocking Buffer** (Bio-Rad, #12010020) – reduces background with phospho-proteins.
- **Chemiluminescent Substrate: Clarity™ or Clarity Max™ ECL Western Blotting Substrate** (Bio-Rad, #1705060 or #1705062)

---

## III. Antibodies

### Primary Antibodies

| Target | Host | Clone | Supplier & Catalog # | Dilution | Expected Band Size |
|--------|------|-------|----------------------|----------|--------------------|
|--------|------|-------|----------------------|----------|--------------------|

|            |        |       |                       |        |        |
|------------|--------|-------|-----------------------|--------|--------|
| <b>Bax</b> | Rabbit | D2E11 | Cell Signaling, #5023 | 1:1000 | 20 kDa |
|------------|--------|-------|-----------------------|--------|--------|

|              |       |     |                     |       |        |
|--------------|-------|-----|---------------------|-------|--------|
| <b>Bcl-2</b> | Mouse | 100 | Santa Cruz, sc-7382 | 1:500 | 26 kDa |
|--------------|-------|-----|---------------------|-------|--------|

|                                 |       |       |                      |        |        |
|---------------------------------|-------|-------|----------------------|--------|--------|
| <b><math>\beta</math>-actin</b> | Mouse | AC-15 | Sigma-Aldrich, A5441 | 1:5000 | 42 kDa |
|---------------------------------|-------|-------|----------------------|--------|--------|

### Secondary Antibodies

- **Anti-Rabbit IgG HRP-linked** (Cell Signaling, #7074) – 1:2000 for Bax.
- **Anti-Mouse IgG HRP-linked** (Cell Signaling, #7076) – 1:2000 for Bcl-2 and  $\beta$ -actin.

---

## IV. Step-by-Step Protocol

### Day 1: Cell Lysis & Protein Quantification

1. **Wash cells** with cold PBS.
2. **Lyse cells** with 300  $\mu\text{L}$  ice-cold RIPA buffer + inhibitors per dish, scraped, collected, and vortexed.
3. **Centrifuge** at 14,000 $\times$ g for 15 min at 4°C.
4. **Collect supernatant**, aliquot, and store at -80°C.
5. **BCA Assay:**
  - Prepare standards (0-2000  $\mu\text{g}/\text{mL}$ ).
  - Mix 10  $\mu\text{L}$  sample with 200  $\mu\text{L}$  working reagent in 96-well plate.
  - Incubate 30 min at 37°C, measure absorbance at 562 nm.
6. **Adjust all samples to equal concentration** (2  $\mu\text{g}/\mu\text{L}$ ) with RIPA buffer + Laemmli sample buffer (4X, Bio-Rad, #1610747) + 5%  $\beta$ -mercaptoethanol.
7. **Denature** at 95°C for 5 min, cool on ice.

---

### Day 1: SDS-PAGE & Transfer

8. **Load 20-30  $\mu\text{g}$  protein** per lane alongside pre-stained ladder (e.g., Precision Plus Protein™ Dual Color, Bio-Rad, #1610374).
9. **Run gel** at 80 V (stacking) then 120 V (resolving) until dye front reaches bottom.
10. **Activate PVDF membrane** in methanol for 1 min, rinse in transfer buffer.
11. **Transfer** using iBlot™ 2: Program P0 (20 V, 1 min; 23 V, 4 min; 25 V, 2 min).
12. **Block membrane** in EveryBlot Blocking Buffer for 5 min at RT.

---

### Day 1: Incubation with Primary Antibodies

13. **Incubate with primary antibody** diluted in blocking buffer **overnight at 4°C** with gentle shaking.
    - *Optional:* Cut membrane horizontally using ladder markers:
      - **Top half (26-42 kDa):** Bcl-2 &  $\beta$ -actin (mouse primaries).
      - **Bottom half (20 kDa):** Bax (rabbit primary).
-

## Day 2: Secondary Incubation & Detection

14. **Wash** 3×10 min with TBST.
  15. **Incubate with species-appropriate HRP-secondary** in blocking buffer for 1 h at RT.
  16. **Wash** 3×10 min with TBST.
  17. **Develop:**
    - Mix Clarity Max ECL reagents 1:1, apply to membrane.
    - Image with **ChemiDoc™ MP Imaging System** (Bio-Rad).
- 

## V. Equipment List

| Device                      | Example Model/Supplier           |
|-----------------------------|----------------------------------|
| Cell culture hood           | Class II, Thermo Scientific      |
| CO <sub>2</sub> incubator   | Thermo Forma Series              |
| Centrifuge                  | Microcentrifuge, Eppendorf 5424R |
| Nanodrop/Spectrophotometer  | Thermo NanoDrop™ One             |
| Gel electrophoresis chamber | Mini-PROTEAN Tetra Cell, Bio-Rad |
| Power supply                | PowerPac™ Basic, Bio-Rad         |
| Transfer system             | iBlot™ 2, Thermo Fisher          |
| Orbital shaker              | VWR® Standard                    |
| Imaging system              | ChemiDoc™ MP, Bio-Rad            |
| Software for analysis       | Image Lab™ (Bio-Rad) or ImageJ   |

---

## VI. Expected Results & Analysis

- **Bax:** Increased band intensity in compound-treated vs. untreated (pro-apoptotic).
  - **Bcl-2:** Decreased band intensity in treated vs. untreated (anti-apoptotic).
  - **β-actin:** Equal loading control across all lanes.
  - **Calculate ratio:** (Bax or Bcl-2 band density) / (β-actin band density) for each sample.
- 

## VII. Troubleshooting Tips

- **High background:** Increase TBST washes, optimize antibody concentration.

- **Non-specific bands:** Include negative control (no primary antibody).
- **No signal:** Check antibody expiration, ensure HRP substrate is fresh.
- **$\beta$ -actin uneven:** Re-run samples, ensure equal protein loading.

**Note:** Validate antibodies using knockdown/knockout controls if available. Optimize exposure times to avoid saturation. Always include molecular weight ladder for accurate band identification.

**Detailed Results:**

| <b>MDA</b>      |        |       |             |              |
|-----------------|--------|-------|-------------|--------------|
| <b>Bax</b>      | 20 kda |       |             |              |
| sample band     | area   | %     | Rel.Density | adj. Density |
| Standard        | 1762   | 17.62 | 1           | 1            |
| <b>M1/MDA</b>   | 6554   | 65.54 | 3.719636776 | 5.951418842  |
| <b>cont.MDA</b> | 2116   | 21.16 | 1.200908059 | 1.921452894  |

| <b>Bcl2</b>     |      |       |             |              |
|-----------------|------|-------|-------------|--------------|
| sample band     | area | %     | Rel.Density | adj. Density |
| Standard        | 2193 | 21.93 | 1           | 1            |
| <b>M1/MDA</b>   | 2911 | 29.11 | 1.32740538  | 2.12384861   |
| <b>cont.MDA</b> | 5433 | 54.33 | 2.47742818  | 3.96388509   |

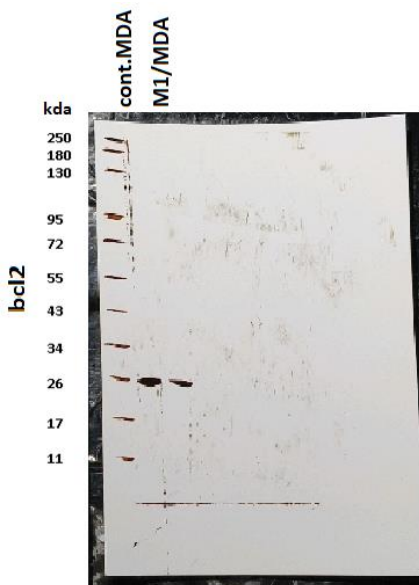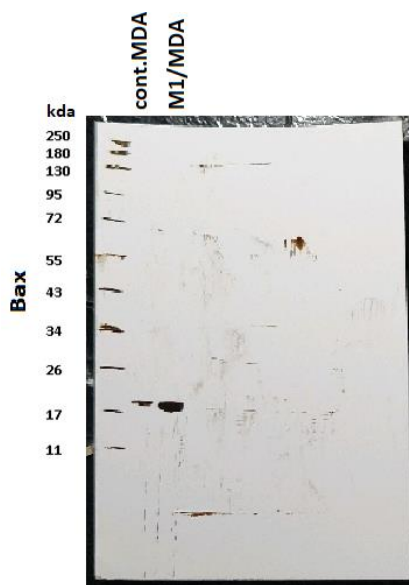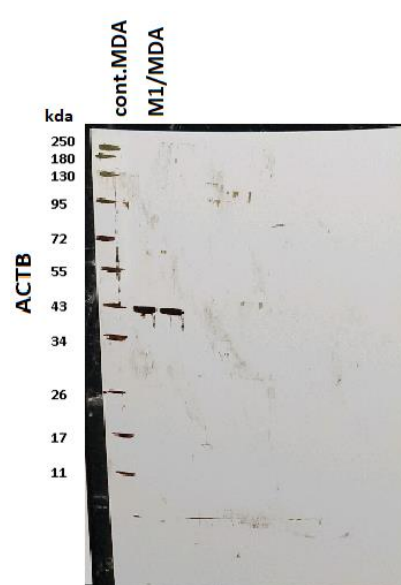

**1- Solubility in PBS (pH = 7.4) for 2 hours of bath sonication**

1.5 mg = 1500 ug with PBS (pH = 7.4) to 10 ml in a measuring flask

Not soluble after 2 hours Highly turbid with visible floating particles

Filtered by 0.45 um Syringe nylon filter Absorbance of the filtrate represents solubility in PBS (pH=7.4)

A at 295 nm against suitable blanking **0.035** From calibration equation  $C = A/\text{slope}$  **1.11 ± 0.06 ug/ml**

**2- Calibration curve**

1.9 mg = 1900 ug dissolved in a 10 ml mixture of ethanol and chloroform in a 2:3 ratio respectively

Clear stock solution

C stock = 1900/10 = 190ug/ml

Spectrum against the mixture blanking

295 nm was selected for calibration curve

Serial dilutions from the stock with the mixture to a volume of 10 ml.

Spectrum of 1.5 ml dilution was superimposed on that of stock

**Average Slope 0.0316 ± 0.002 ml/ug**

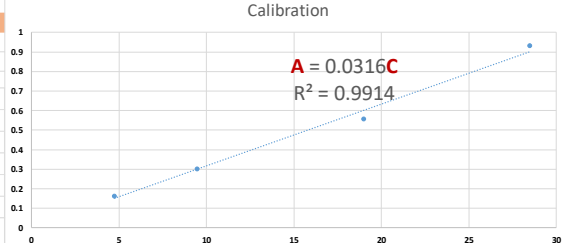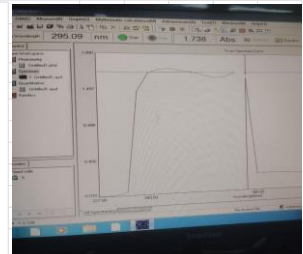

**3- Partitioning Co-efficient (log P)**

2 mg = 2000 ug with 20 ml chloroform- bath sonication (turbid suspension with no visible particles or sedimentation)

Filtered by 0.45 um Syringe nylon filter 10 ml of clear filtrate (saturated) vigorously mixed with 10 ml water

Separating funnel (lower chloroform phase and upper water phase)

**log p = log (concentration in chloroform phase/concentration in water phase)**

log p = log ( Absorbance of chloroform phase/Absorbance of water phase)

A at 295nm of chloroform phase against suitable blanking **0.713** **log p 1.309**

A at 295nm of water phase against suitable blanking **0.035**

As water phase could possibly have chloroform droplets during separation

Maximum absorbance of saturated water with formulation at 295 nm against suitable blanking was taken into consideration (most near to separating funnel method)

Absorbance of saturated water **0.008**

**log p 1.95**

**Average log p 1.63 SD 0.453**

**Average log p ± SD = 1.63 ± 0.45**

- [1] K.S. Suvarna, C. Layton, J.D. Bancroft, Bancroft's theory and practice of histological techniques E-Book, Elsevier health sciences, 2018.
- [2] G.A. Abdel-Latif, A.S. Al-Kashef, M.U. Nooman, A.E.-N.A. Khattab, S.M. Gebril, N.F. Elmongy, S.S. Abbas, The mechanistic interplay between Nrf-2, NF- $\kappa$ B/MAPK, caspase-dependent apoptosis, and autophagy in the hepatoprotective effects of Sophorolipids produced by microbial conversion of banana peels using *Saccharomyces cerevisiae* against doxorubicin-induced hepatotoxicity in rats, *Food and Chemical Toxicology*, 182 (2023) 114119.
